# Supplementary material
Source: ML conference proceedings conference paper supplement (https://proceedings.neurips.cc/paper_files/paper/2020/hash/4eff0720836a198b6174eecf02cbfdbf-Abstract.html)
Supplement: Supplementary file [file 4eff0720836a198b6174eecf02cbfdbf-Supplemental.pdf]

---

# Synthetic Data Generators – Sequential and Private

---

Anonymous Author(s)

Affiliation

Address

email

## Abstract

1 We study the sample complexity of private synthetic data generation over an  
2 unbounded sized class of statistical queries, and show that any class that is privately  
3 proper PAC learnable admits a private synthetic data generator (perhaps non-  
4 efficient). A differentially private synthetic generator is an algorithm that receives  
5 a IID data and publishes synthetic data that is indistinguishable from the true data  
6 w.r.t a given fixed class of statistical queries. The synthetic data set can then be  
7 used by a data scientist without compromising the privacy of the original data set.  
8 Previous work on synthetic data generators focused on the case that the query class  
9  $\mathcal{D}$  is finite and obtained sample complexity bounds that scale logarithmically with  
10 the size  $|\mathcal{D}|$ . Here we construct a private synthetic data generator whose sample  
11 complexity is independent of the domain size, and we replace finiteness with the  
12 assumption that  $\mathcal{D}$  is privately PAC learnable (a formally weaker task, hence we  
13 obtain equivalence between the two tasks).

14 Our proof relies on a new type of synthetic data generator, Sequential Synthetic  
15 Data Generators, which we believe may be of interest of their own right. A  
16 sequential SDG is defined by a sequential game between a generator that proposes  
17 synthetic distributions and a discriminator that tries to distinguish between real  
18 and fake distributions. We characterize the classes that admits a sequential-SDG  
19 and show that they are exactly Littlestone classes. Given the online nature of  
20 the Sequential setting, it is natural that Littlestone classes arise in this context.  
21 Nevertheless, the characterization of Sequential-SDGs by Littlestone classes turns  
22 out to be technically challenging, and to the best of the authors knowledge, does  
23 not follow via simple reductions to online prediction.

## 24 1 Introduction

25 Generating differentially-private synthetic data [8, 15] is a fundamental task in learning that has won  
26 considerable attention in the last few years [23, 40, 24, 17].

27 Formally, given a class  $\mathcal{D}$  of distinguishing functions, a fooling algorithm receives as input IID  
28 samples from an unknown real-life distribution,  $p_{real}$ , and outputs a distribution  $p_{syn}$  that is  $\epsilon$ -close  
29 to  $p_{real}$  w.r.t the *Integral Probability Metric* ([31]), denoted  $IPM_{\mathcal{D}}$ :

$$IPM_{\mathcal{D}}(p, q) = \sup_{d \in \mathcal{D}} \left| \mathbb{E}_{x \sim p} [d(x)] - \mathbb{E}_{x \sim q} [d(x)] \right| \quad (1)$$

30 A DP-SDG is then simply defined to be a differentially private fooling algorithm.

31 A fundamental question is then: Which classes  $\mathcal{D}$  can be privately fooled? In this paper, we focus  
32 on sample complexity bounds and give a first such characterization. We prove that a class  $\mathcal{D}$  is  
33 DP-foolable if and only if it is privately (proper) PAC learnable. As a corollary, we obtain equivalence

34 between several important tasks within private learning such as proper PAC Learning [26], Data  
35 Release [15], Sanitization [5] and what we will term here *Private Uniform Convergence*.

36 Much focus has been given to the task of synthetic data generation. Also, several papers [24, 17,  
37 21, 22] discuss the reduction of private fooling to private PAC learning. In contrast with previous  
38 work, we assume an arbitrary large domain. In detail, previous existing bounds normally scale  
39 logarithmically with the size of the query class  $\mathcal{D}$  (or alternatively, depend on the size of the domain).  
40 Here we initiate a study of the sample complexity that does not assume that the size of the domain is  
41 fixed. Instead, we only assume that the class is privately PAC learnable, and obtain sample complexity  
42 bounds that are independent of the cardinality  $|\mathcal{D}|$ . We note that the existence of a private synthetic  
43 data generator entails private proper PAC learning, hence our assumption is a necessary condition for  
44 the existence of a DP-SDG.

45 The general approach taken for generating synthetic data (which we also follow here) is to exploit  
46 an online setup of a sequential game between a generator that aims to fool a discriminator and a  
47 discriminator that attempts to distinguish between real and fake data. The utility and generality  
48 of this technical method, in the context of privacy, has been observed in several previous works  
49 [23, 36, 21]. However, in the finite case, specific on-line algorithms, such as *Multiplicative Weights*  
50 and *Follow-the-Perturbed-Leader* are considered. The algorithms are then exploited, in a white-box  
51 fashion, that allow easy construction of SDGs. The technical challenge we face in this work is to  
52 generalize the above technique in order to allow the use of no-regret algorithms that work over infinite  
53 classes. Such algorithms don't necessarily share the attractive traits of MW and FtPL that allow their  
54 exploitation for generating synthetic data. To overcome this, we study here a general framework of  
55 *sequential SDGs* and show how an *arbitrary* online algorithm can be turned, via a Black-box process,  
56 into an SDG which in turn can be privatized. We discuss these challenges in more detail in ??.

57 Thus, the technical workhorse behind our proof is a learning primitive which is of interest of its own  
58 right. We term it here *Sequential Synthetic Data Generator* (Sequential-SDG). Similar frameworks  
59 appeared [21], and not only in the context of private-SDGs but also more broadly [20, 29] in  
60 theoretical studies about generative learning algorithms [19, 18].

61 In the sequential-SDG setting, we consider a sequential game between a generator (player G) and a  
62 discriminator (player D). At every iteration, player G proposes a distribution and player D outputs a  
63 discriminating function from a prespecified binary class  $\mathcal{D}$ . The game stops when player G proposes  
64 a distribution that is close in  $\text{IPM}_{\mathcal{D}}$  distance to the true target distribution. As we focus on the  
65 statistical limits of the model, we ignore the optimization and computational complexity aspects and  
66 we assume that both players are omnipotent in terms of their computational power.

67 We provide here characterization of the classes that can be *sequentially fooled* (i.e. classes  $\mathcal{D}$  for  
68 which we can construct a sequential SDG) and show that the sequentially foolable classes are exactly  
69 *Littlestone classes* [30, 6]. In turn, we harness sequential SDGs to generate synthetic data together  
70 with a private discriminator in order to generate private synthetic data. Because this framework  
71 assumes only a private learner, we in some sense show that the sequential setting is a canonical  
72 method to generate synthetic data.

73 To summarize this work contains several contributions: We provide the first domain-size independent  
74 sample complexity bounds for DP-Fooling, and show an equivalence between private synthetic data  
75 generation and private learning. Second, we introduce and characterize a new class of SDGs and  
76 demonstrate their utility in the construction of private synthetic data.

## 77 2 Prelimineries

78 In this section we recall standard definitions and notions in differential privacy and learning (a more  
79 extensive background is also given in Appendix A). Throughout the paper we will study classes  $\mathcal{D}$  of  
80 boolean functions defined on a domain  $\mathcal{X}$ . However, we will often use a dual point of view where we  
81 think of  $\mathcal{X}$  as the class of functions and on  $\mathcal{D}$  as the domain. Therefore, in order to avoid confusion,  
82 in this section we let  $\mathcal{W}$  denote the domain and  $\mathcal{H} \subseteq \{0, 1\}^{\mathcal{W}}$  to denote the functions class.

83 **2.1 Differential Privacy and Private Learning**

84 Differential Privacy [14, 13] is a statistical formalism which aims at capturing algorithmic privacy. It  
 85 concerns with problems whose input contains databases with private records and it enables to design  
 86 algorithms that are formally guaranteed to protect the private information. For more background see  
 87 the surveys [16, 41].

88 The formal definition is as follows: let  $\mathcal{W}^m$  denote the input space. An input instance  $\Omega \in \mathcal{W}^m$  is  
 89 called a *database*, and two databases  $\Omega', \Omega'' \in \mathcal{W}^m$  are called neighbours if there exists a single  
 90  $i \leq m$  such that  $\Omega'_i \neq \Omega''_i$ . Let  $\alpha, \beta > 0$  be the privacy parameters, a randomized algorithm  
 91  $M : \mathcal{W}^m \rightarrow \Sigma$  is called  $(\alpha, \beta)$ -differentially private if for every two neighbouring  $\Omega', \Omega'' \in \mathcal{W}^m$   
 92 and for every event  $E \subseteq \Sigma$ :

$$\Pr[M(\Omega') \in E] \leq e^\alpha \Pr[M(\Omega'') \in E] + \beta.$$

93 An algorithm  $M : \cup_{m=1}^\infty \mathcal{W}^m \rightarrow Y$  is called differentially private if for every  $m$  its restriction to  $\mathcal{W}^m$   
 94 is  $(\alpha(m), \beta(m))$ -differentially private, where  $\alpha(m) = O(1)$  and  $\beta(m)$  is negligible<sup>1</sup>. Concretely,  
 95 we will think of  $\alpha(m)$  as a small constant (say, 0.1) and  $\beta(m) = O(m^{-\log m})$ .

96 **Private Learning.** We next overview the notion of Differentially private learning algorithms [26].  
 97 In this context the input database is the training set of the algorithm.

98 Given a hypothesis class  $\mathcal{H}$  over a domain  $W$ , we say that  $\mathcal{H} \subseteq \{0, 1\}^W$  is privately PAC learnable  
 99 if it can be learned by a differentially private algorithm. That is, if there is a differentially private  
 100 algorithm  $M$  and a sample complexity bound  $m(\epsilon, \delta) = \text{poly}(1/\epsilon, 1/\delta)$  such that for every  $\epsilon, \delta > 0$   
 101 and every distribution  $\mathbb{P}$  over  $W \times \{0, 1\}$ , if  $M$  receives an independent sample  $S \sim \mathbb{P}^m$  then it  
 102 outputs an hypothesis  $h_S$  such that with probability at least  $1 - \delta$ :

$$L_{\mathbb{P}}(h_S) \leq \min_{h \in \mathcal{H}} L_{\mathbb{P}}(h) + \epsilon,$$

103 where  $L_{\mathbb{P}}(h) = \mathbb{E}_{(w,y) \sim \mathbb{P}}[1[h(w) \neq y]]$ . If  $M$  is *proper*, namely  $h_S \in \mathcal{H}$  for every input sample  $S$ ,  
 104 then  $\mathcal{H}$  is said to be Privately Agnostically and Properly PAC learnable (PAP-PAC-learnable).

105 In some of our proofs it will be convenient to consider private learning algorithms whose privacy  
 106 parameter  $\alpha$  satisfies  $\alpha \leq 1$  (rather than  $\alpha = O(1)$  as in the definition of private algorithms). This can  
 107 be done without loss of generality due to privacy amplification theorems (see, for example (similar,  
 108 for example [41] (Definition 8.2) and references within (see also discussion after Lemma 3 for further  
 109 details).

110 **Sanitization.** The notion of sanitization has been introduced in [8] and further studied in [5]. Let  
 111  $\mathcal{H} \subseteq \{0, 1\}^W$  be a class of functions. An  $(\epsilon, \delta, \alpha, \beta, m)$ -*sanitizer* for  $\mathcal{H}$  is an  $(\alpha, \beta)$ -private algorithm  
 112  $M$  that receives as an input a sample  $S \in \mathcal{W}^m$  and outputs a function  $\text{Est} : \mathcal{H} \rightarrow [0, 1]$  such that  
 113 with probability at least  $1 - \delta$ ,

$$(\forall h \in \mathcal{H}) : \left| \text{Est}(h) - \frac{|\{w \in S : h(w) = 1\}|}{|S|} \right| \leq \epsilon.$$

114 We say that  $\mathcal{H}$  is *sanitizable* if there exists an algorithm  $M$  and a bound  $m(\epsilon, \delta) = \text{poly}(1/\epsilon, 1/\delta)$   
 115 such that for every  $\epsilon, \delta > 0$ , the restriction of  $M$  to samples of size  $m = m(\epsilon, \delta)$  is an  $(\epsilon, \delta, \alpha, \beta, m)$ -  
 116 sanitizer for  $\mathcal{H}$  with  $\alpha = \alpha(m) = O(1)$  and  $\beta = \beta(m)$  negligible.

117 **Private Uniform Convergence.** A basic concept in Statistical Learning Theory is the notion of  
 118 *uniform convergence*. In a nutshell, a class of hypotheses  $\mathcal{H}$  satisfies the uniform convergence property  
 119 if for any unknown distribution  $\mathbb{P}$  over examples, one can uniformly estimate the expected losses  
 120 of all hypotheses in  $\mathcal{H}$  given a large enough sample from  $P$ . Uniform convergence and statistical  
 121 learning are closely related. For example, the *Fundamental Theorem of PAC Learning* asserts that  
 122 they are equivalent for binary-classification [37].

123 This notion extends to the setting of private learning: a class  $\mathcal{H}$  satisfies the *Private Uniform*  
 124 *Convergence* property if there exists a differentially private algorithm  $M$  and a sample complexity

<sup>1</sup>I.e.  $\beta(m) = o(m^{-k})$  for every  $k > 0$ .

125 bound  $m(\epsilon, \delta) = \text{poly}(1/\epsilon, 1/\delta)$  such that for every distribution  $\mathbb{P}$  over  $\mathcal{W} \times \{0, 1\}$  the following  
 126 holds: if  $M$  is given an input sample  $S$  of size at least  $m(\epsilon, \delta)$  which is drawn independently from  $\mathbb{P}$ ,  
 127 then it outputs an estimator  $\hat{L} : \mathcal{H} \rightarrow [0, 1]$  such that with probability at least  $(1 - \delta)$  it holds that

$$(\forall h \in \mathcal{H}) : |\hat{L}(h) - L_{\mathbb{P}}(h)| \leq \epsilon.$$

128 Note that without the privacy restriction, the estimator

$$\hat{L}(h) = L_S(h) := \frac{|\{(w_i, y_i) \in S : h(w_i) \neq y_i\}|}{|S|}$$

129 satisfies the requirement for  $m = \tilde{O}(d/\epsilon^2)$ , where  $d$  is the VC-dimension of  $\mathcal{H}$ ; this follows by the  
 130 celebrated VC-Theorem [42, 37].

### 131 3 Problem Setup

132 We assume a domain  $\mathcal{X}$  and we let  $\mathcal{D} \subseteq \{0, 1\}^{\mathcal{X}}$  be a class of functions over  $\mathcal{X}$ . The class  $\mathcal{D}$  is  
 133 referred to as the *discriminating functions class* and its members  $d \in \mathcal{D}$  are called *discriminating*  
 134 *functions* or *distinguishers*. We let  $\Delta(\mathcal{X})$  denote the space of distributions over  $\mathcal{X}$ . Given two  
 135 distributions  $p, q \in \Delta(\mathcal{X})$ , let  $\text{IPM}_{\mathcal{D}}(p, q)$  denote the IPM distance between  $p$  and  $q$  as in Eq. (1).

136 It will be convenient to assume that  $\mathcal{D}$  is *symmetric*, i.e. that whenever  $d \in \mathcal{D}$  then also its complement,  
 137  $1 - d \in \mathcal{D}$ . Assuming that  $\mathcal{D}$  is symmetric will not lose generality and will help simplify notations.  
 138 We will also use the following shorthand: given a distribution  $p$  and a distinguisher  $d$  we will often  
 139 write

$$p(d) := \mathbb{E}_{x \sim p} [d(x)].$$

140 Under this assumption and notation we can remove the absolute value from the definition of IPM:

$$\text{IPM}_{\mathcal{D}}(p, q) = \sup_{d \in \mathcal{D}} (p(d) - q(d)). \quad (2)$$

#### 141 3.1 Synthetic Data Generators

142 A synthetic data generator (SDG), without additional constraints, is defined as follows

143 **Definition 1** (SDG). *An SDG, or a fooling algorithm, for  $\mathcal{D}$  with sample complexity  $m(\epsilon, \delta)$  is an*  
 144 *algorithm  $M$  that receives as input a sample  $S$  of points from  $\mathcal{X}$  and parameters  $\epsilon, \delta$  such that the*  
 145 *following holds: for every  $\epsilon, \delta > 0$  and every target distribution  $p_{\text{real}}$ , if  $S$  is an independent sample*  
 146 *of size at least  $m(\epsilon, \delta)$  from  $p_{\text{real}}$  then*

$$\Pr \left[ \text{IPM}_{\mathcal{D}}(p_{\text{syn}}, p_{\text{real}}) < \epsilon \right] \geq 1 - \delta,$$

147 where  $p_{\text{syn}} := M(S)$  is the distribution outputted by  $M$ , and the probability is taken over  $S \sim$   
 148  $(p_{\text{real}})^m$  as well as over the randomness of  $M$ .

149 We will say that a class is *foolable* if it can be fooled by an SDG algorithm whose sample complexity  
 150 is  $\text{poly}(\frac{1}{\epsilon}, \frac{1}{\delta})$ . Foolability, without further constraints, comes with the following characterization  
 151 which is an immediate corollary (or rather a reformulation) of the celebrated VC Theorem ([42]).

152 Denote by  $M_{\text{emp}}$  an algorithm that receives a sample  $S$  and returns  $M_{\text{emp}}(S) := p_S$ , the empirical  
 153 distribution over  $S$ .

154 **Observation 1** ([42]). *The following statements are equivalent for a class  $\mathcal{D} \subseteq \{0, 1\}^{\mathcal{X}}$ :*

- 155 1.  $\mathcal{D}$  is PAC-learnable.
- 156 2.  $\mathcal{D}$  is foolable.
- 157 3.  $\mathcal{D}$  satisfies the uniform convergence property.
- 158 4.  $\mathcal{D}$  has a finite VC-dimension.
- 159 5.  $M_{\text{emp}}$  is a fooling algorithm for  $\mathcal{D}$  with sample complexity  $m = O(\frac{\log 1/\delta}{\epsilon^2})$ .

160 Observation 1 shows that foolability is equivalent to PAC-learnability (and in turn to finite VC di-  
 161 mension). We will later see analogous results for DP-Foolability (which is equivalent to differentially  
 162 private PAC learnability) and Sequential-Foolability (which is equivalent to online learnability).

163 We now discuss the two fundamental models that are the focus of this work – DP-Foolability and  
 164 Sequential-Foolability.

### 165 3.2 DP-Synthetic Data Generators

166 We next introduce the notion of a DP-synthetic data generator and DP-Foolability. As discussed,  
 167 DP-SDGs have been the focus of study of several papers [8, 15, 23, 40, 24, 17].

168 **Definition 2 (DP-SDG).** *A DP-SDG, or a DP-fooling algorithm  $M$  for a class  $\mathcal{D}$  is an algorithm  
 169 that receives as an input a finite sample  $S$  and two parameters  $(\epsilon, \delta)$  and satisfies:*

- 170 • **Differential Privacy.** *For every  $m$ , the restriction of  $M$  to input samples  $S$  of size  $m$  is  
 171  $(\alpha(m), \beta(m))$ -differentially private, where  $\alpha(m) = O(1)$  and  $\beta(m)$  is negligible.*
- 172 • **Fooling.**  *$M$  fools  $\mathcal{D}$ : there exists a sample complexity bound  $m = m(\epsilon, \delta)$  such that for  
 173 every target distribution  $p_{real}$  if  $S$  is a sample of at least  $m$  examples from  $p_{real}$  then  
 174  $\text{IPM}_{\mathcal{D}}(p_{syn}, p_{real}) \leq \epsilon$  with probability at least  $1 - \delta$ , where  $p_{syn}$  is the output of  $M$  on  
 175 the input sample  $S$ .*

176 We will say in short that a class  $\mathcal{D}$  is DP-Foolable if there exists a DP-SDG for the class  $\mathcal{D}$  with  
 177 sample complexity  $m = \text{poly}(1/\epsilon, 1/\delta)$ .

### 178 3.3 Sequential-Synthetic Data Generators

179 We now describe the second model of foolability which, as discussed, is the technical engine behind  
 180 our proof of equivalence between DP-foolability and DP-learning.

181 **Sequential-SDGs** A Sequential-SDG can be thought of as a sequential game between two players  
 182 called the *generator* (denoted by  $G$ ) and the *discriminator* (denoted by  $D$ ). At the beginning of the  
 183 game, the discriminator  $D$  receives the target distribution which is denoted by  $p_{real}$ . The goal of the  
 184 generator  $G$  is to find a distribution  $p$  such that  $p$  and  $p_{real}$  are  $\epsilon$ -indistinguishable with respect to  
 185 some prespecified discriminating class  $\mathcal{D}$  and an error parameter  $\epsilon > 0$ , i.e.

$$\text{IPM}_{\mathcal{D}}(p, p_{real}) \leq \epsilon.$$

186 We note that both players know  $\mathcal{D}$  and  $\epsilon$ . The game proceeds in rounds, where in each round  $t$  the  
 187 generator  $G$  submits to the discriminator a candidate distribution  $p_t$  and the discriminator replies  
 188 according to the following rule: if  $\text{IPM}_{\mathcal{D}}(p_t, p_{real}) \leq \epsilon$  then the discriminator replies “WIN” and the  
 189 game terminates. Else, the discriminator picks  $d_t \in \mathcal{D}$  such that  $|p_{real}(d_t) - p_t(d_t)| > \epsilon$ , and sends  
 190  $d_t$  to the generator along with a bit which indicates whether  $p_t(d_t) > p_{real}(d_t)$  or  $p_t(d_t) < p_{real}(d_t)$ .  
 191 Equivalently, instead of transmitting an extra bit, we assume that the discriminator always sends  
 192  $d_t \in \mathcal{D} \cup (1 - \mathcal{D})$  s.t.

$$p_{real}(d_t) - p_t(d_t) > \epsilon. \tag{3}$$

193 **Definition 3 (Sequential-Foolability).** *Let  $\epsilon > 0$  and let  $\mathcal{D}$  be a discriminating class.*

- 194 1.  *$\mathcal{D}$  is called  $\epsilon$ -Sequential-Foolable if there exists a generator  $G$  and a bound  $T = T(\epsilon)$  such  
 195 that  $G$  wins any discriminator  $D$  with any target distribution  $p_{real}$  after at most  $T$  rounds.*
- 196 2. *The round complexity of Sequential-Fooling  $\mathcal{D}$  is defined as the minimal upper bound  $T(\epsilon)$   
 197 on the number of rounds that suffice to  $\epsilon$ -Fool  $\mathcal{D}$ .*
- 198 3.  *$\mathcal{D}$  is called Sequential-Foolable if it is  $\epsilon$ -Sequential foolable for every  $\epsilon > 0$  with  $T(\epsilon) =$   
 199  $\text{poly}(1/\epsilon)$ .*

200 In the next section we will see that if  $\mathcal{D}$  is  $\epsilon$ -Sequential-Foolable for some fixed  $\epsilon < 1/2$  then it is  
 201 Sequential-Foolable with round complexity  $T(\epsilon) = O(1/\epsilon^2)$ .

202 **4 Results**

203 Our main result characterizes DP-Foolability in terms of basic notions from differential privacy and  
 204 PAC learning.

205 **Theorem 1** (Characterization of DP-Fooling). *The following statements are equivalent for a class*  
 206  $\mathcal{D} \subseteq \{0, 1\}^X$ :

- 207 1.  $\mathcal{D}$  is privately and properly learnable in the agnostic PAC setting.
- 208 2.  $\mathcal{D}$  is DP-Foolable.
- 209 3.  $\mathcal{D}$  is sanitizable.
- 210 4.  $\mathcal{D}$  satisfies the private uniform convergence property.

211 The implication Item 3  $\implies$  Item 1 was known prior to this work and was proven in [5]. The  
 212 equivalence among Items 2 to 4 is natural and expected. Indeed, each of them expresses the existence  
 213 of a private algorithm that *publishes, privately, certain estimates of all functions in  $\mathcal{D}$* .

214 The fact that Item 1 implies the other three items is perhaps more surprising, and the main contribution  
 215 of this work, and we show that Item 1 implies Item 2. Our proof of that exploits the Sequential  
 216 framework. In a nutshell, we observe that a class that is both sequentially foolable and privately pac  
 217 learnable is also DP-foolable: this result follows by constructing a sequential SDG that with a private  
 218 discriminator, that is assumed to exist, combined with standard compositional and preprocessing  
 219 arguments regarding the privacy of the generators output.

220 Thus to prove the implication we only need to show that private PAC learning implies sequential  
 221 foolability. This result follows from Corollary 2 that provides characterization of sequential foolable  
 222 classes as well as a recent result by [1] that shows that private PAC learnable classes have finite  
 223 Littlestone dimension. See Appendix B.2 for a complete proof.

224 **Private learnability versus private uniform convergence.** The equivalence Item 1  $\iff$  Item 4  
 225 is between private learning and private uniform convergence. The non-private analogue of this  
 226 equivalence is a cornerstone in statistical learning; it reduces the statistical challenge of minimizing  
 227 an unknown population loss to an optimization problem of minimizing a known empirical estimate.  
 228 In particular, it yields the celebrated *Empirical Risk Minimization (ERM)* principle: “Output  $h \in \mathcal{H}$   
 229 that minimizes the empirical loss”. We therefore highlight this equivalence in the following corollary:

230 **Corollary 1** (Private proper learning = private uniform convergence). *Let  $\mathcal{H} \subseteq \{0, 1\}^X$ . Then  $\mathcal{H}$*   
 231 *is privately and properly PAC learnable if and only if  $\mathcal{H}$  satisfies the private uniform convergence*  
 232 *property.*

233 **Sequential-SDGs** We next describe our characterization of Sequential-SDGs. As discussed, this  
 234 characterization is the technical heart behind the equivalence between private PAC learning and  
 235 DP-foolability. Nevertheless we believe that it may be of interest of its own right. We thus provide  
 236 quantitative upper and lower bounds on the round complexity of Sequential-SDGs in terms of the  
 237 Littlestone dimension (see [6] or Appendix A for the exact definition).

238 **Theorem 2** (Quantitative round-complexity bounds). *Let  $\mathcal{D}$  be a discriminating class with dual*  
 239 *Littlestone dimension  $\ell^*$  and let  $T(\epsilon)$  denote the round complexity of Sequential-Fooling  $\mathcal{D}$ . Then,*

- 240 1.  $T(\epsilon) = O\left(\frac{\ell^*}{\epsilon^2} \log \frac{\ell^*}{\epsilon}\right)$  for every  $\epsilon$ .
- 241 2.  $T(\epsilon) \geq \frac{\ell^*}{2}$  for every  $\epsilon < \frac{1}{2}$ .

242 To prove Item 1 we construct a generator with winning strategy which we outline in ???. A complete  
 243 proof of Theorem 2 appears in Appendix B.1.1. As a corollary we get the following characterization  
 244 of Sequential-Foolability:

245 **Corollary 2** (Characterization of Sequential-Foolability). *The following are equivalent for  $\mathcal{D} \subseteq$*   
 246  *$\{0, 1\}^X$ :*

- 247 1.  $\mathcal{D}$  is Sequential-Foolable.

248 2.  $\mathcal{D}$  is  $\epsilon$ -Sequential-Foolable for some  $\epsilon < 1/2$ .

249 3.  $\mathcal{D}$  has a finite dual Littlestone dimension.

250 4.  $\mathcal{D}$  has a finite Littlestone dimension.

251 Corollary 2 follows directly from Theorem 2 (which gives the equivalences  $1 \iff 2 \iff 3$ ) and  
252 from [7] (which gives the equivalence  $3 \iff 4$ , see Lemma 4 for further detail).

253 **Sequential-SDGs versus DP-SDGs** So far we have introduced and characterized two formal setups  
254 for synthetic data generation. It is therefore natural to compare and seek connections between these  
255 two frameworks. We first note that the DP setting may only be more restrictive than the Sequential  
256 setting:

257 **Corollary 3** (DP-Foolability implies Sequential-Foolability). *Let  $\mathcal{D}$  be a class that is DP-Foolable.*  
258 *Then  $\mathcal{D}$  has finite Littlestone dimension and in particular is Sequential-Foolable.*

259 Corollary 3 follows from Theorem 1: indeed, the latter yields that DP-Foolability is equivalent to  
260 Private agnostic proper  $\epsilon$ -PAC learnability (PAP-PAC), and by [1] PAP-PAC learnability implies a  
261 finite Littlestone dimension which by Corollary 2 implies Sequential-Foolability.

262 **Towards a converse of Corollary 3.** By the above it follows that the family of classes  $\mathcal{D}$  that can  
263 be fooled by a DP algorithm is contained in the family of all Sequential-Foolable classes; specifically,  
264 those which admit a Sequential-SDG with a differentially private discriminator.

265 We do not know whether the converse holds; i.e. whether “Sequential-Foolability  $\implies$  DP-Foolability”.  
266 Nevertheless, the implication “PAP-PAC learnability  $\implies$  DP-Foolability” (Theorem 1) can  
267 be regarded as an intermediate step towards this converse. Indeed, as discussed above, PAP-PAC  
268 learnability implies Sequential-Foolability. It is therefore natural to consider the following question,  
269 which is equivalent<sup>2</sup> to the converse of Corollary 3:

270 **Question 1.** *Let  $\mathcal{D}$  be a class that has finite Littlestone dimension. Is  $\mathcal{D}$  properly and privately*  
271 *learnable in the agnostic PAC setting?*

272 A weaker form of this question – Whether every Littlestone class is privately PAC Learnable? – was  
273 posed by [1] as an open question (and was recently resolved in [9]).

## 274 5 Discussion

275 In this work we developed a theory for two types of constrained-SDG, sequential and private. Let us  
276 now discuss SDGs more generally, and we broadly want to consider algorithms that observe data,  
277 sampled from some real-life distribution, and in turn generate new synthetic examples that *resemble*  
278 real-life samples, without any a-priori constraints. For example, consider an algorithm that receives  
279 as input some tunes from a specific music genre (e.g. jazz, rock, pop) and then outputs a new tune.

280 Recently, there has been a remarkable breakthrough in the the construction of such SDGs with the  
281 introduction of the algorithmic frameworks of *Generative Adversarial Networks* (GANs) [19, 18], as  
282 well as Variational AutoEncoders (VAE) [28, 33]. In turn, the use of SDGs has seen many potential  
283 applications [25, 32, 43]. Here we followed a common tinterpretation of SDGs as *IPM minimizers*  
284 [2, 4]. However, it was also observed [2, 3] that there is a critical gap between the task of generating  
285 *new* synthetic data (such as new tunes) and the IPM minimization problem: In detail, Observation 1  
286 shows that the IPM framework allows certain “bad” solutions that *memorize*. Specifically, let  $S$   
287 be a sufficiently large independent sample from the target distribution and consider the *empirical*  
288 *distribution* as a candidate solution to the IPM minimization problem. Then, with high probability,  
289 the IPM distance between the empirical and the target distribution vanishes as  $|S|$  grows.

290 To illustrate the problem, imagine that our goal is to generate new jazz tunes. Let us consider the  
291 discriminating class of all human music experts. The solution suggested above uses the empirical  
292 distribution and simply “generates” a tune from the training set<sup>3</sup>. This clearly misses the goal of

<sup>2</sup>I.e. an affirmative answer to Question 1 is equivalent to the converse of Corollary 3.

<sup>3</sup>There are at most  $7 \cdot 10^9$  music experts in the world. Hence, by standard concentration inequalities a sample of size roughly  $\frac{9}{\epsilon^2} \log 10$  suffices to achieve IPM distance at most  $\epsilon$  with high probability.

293 generating new and original tunes but the IPM distance minimization framework does not discard this  
294 solution. For this reason we often invoke further restrictions on the SDG and consider constrained-  
295 SDGs. For example, [4] suggests to restrict the class of possible outputs  $p_{syn}$  and shows that, under  
296 certain assumptions on the distribution  $p_{real}$ , the right choice of class  $\mathcal{D}$  leads to learning the true  
297 underlying distribution (in Wasserstein distance).

298 In this work we explored two other types of constrained-SDGs, DP-SDGs and Sequential-SDGs,  
299 and we characterized the foolable classes in a distribution independent model, i.e. without making  
300 assumptions on the distribution  $p_{real}$ . One motivation for studying these models, as well as the  
301 interest in a distribution independent setting, is the following underlying question:

302 The output of Synthetic Data Generators should be **new** examples. But in what sense we require the  
303 output to be novel or *distinct* from the training set? How and in what sense we should avoid copying  
304 the training data or even outputting a memorized version of it?

305 To answer such questions is of practical importance. For example, consider a company that wishes to  
306 automatically generate music or images to be used commercially. One approach could be to train an  
307 SDG, and then sell the generated output. What can we say about the output of SDGs in this context?  
308 Are the images generated by the SDG original? Are they copying the data? or breaching copyright?

309 In this context, the differentially private setup comes with a very attractive interpretation that provides  
310 further motivation to study DP-SDGs, beyond preserving privacy of the dataset. To illustrate our  
311 interpretation of differential privacy as a criterion for originality consider the following situation:  
312 imagine that Lisa is a learning painter. She has learned to paint by observing samples of painting,  
313 produced by a mentor painter Mona. After a learning process, she draws a new painting  $L$ . Mona  
314 agrees that this new painting is a valid work of art, but Mona claims the result is not an original  
315 painting but a mere copy of a painting, say  $M$ , produced by Mona.

316 How can Lisa argue that paint  $L$  is not a plagiarist? The easiest argument would be that she had never  
317 observed  $M$ . However, this line of defence is not always realistic as she must observe *some* paintings.  
318 Instead, we will argue using the following thought experiment: *What if* Lisa never observed  $M$ ?  
319 Might she still create  $L$ ? If we could prove that this is the case, then one could argue similarly that  $L$   
320 is not a plagiarist.

321 The last argument is captured by the notion of *differential privacy*. In a nutshell, a randomized algo-  
322 rithm that receives a sequence of data points  $\bar{x}$  as input is differentially private if removing/replacing  
323 a single data point in its input, does not affect its output  $y$  by much; more accurately, for any event  
324  $E$  over the output  $y$  that has non-negligible probability on input  $\bar{x}$ , then the probability remains  
325 non-negligible even after modifying one data point in  $\bar{x}$ .

326 The sequential setting also comes with an appealing interpretation in this context. A remarkable  
327 property of existing SDGs (e.g. GANs), that potentially reduces the likeliness of memorization, is  
328 that the generator's access to the sample is masked. In more detail, the generator only has restricted  
329 access to the training set via feedback from a discriminator that observes real data vs. synthetic data.  
330 Thus, potentially, the generator may avoid degenerate solutions that memorize. Nevertheless, even  
331 though the generator is not given a direct access to the training data, it could still be that information  
332 about this data could "leak" through the feedback it receives from the discriminator. This raises  
333 the question of whether Sequential-Foolability can provide guarantees against memorization, and  
334 perhaps more importantly, in what sense? To start answering this question part of this work aims to  
335 understand the interconnection between the task of Sequential-Fooling and the task of DP-Fooling.

336 Finally, the above questions also motivate our interest in a distribution-independent setting, that  
337 avoids assumptions on the distribution  $p_{real}$  which we often don't know. In detail, if we only cared  
338 about the resemblance between  $p_{real}$  and  $p_{syn}$  then we may be content with any algorithm that  
339 performs well in practice regardless of whether certain assumptions that we made in the analysis  
340 hold or not. But, if we care to obtain guarantees against copying or memorizing, then these should  
341 principally hold. And thus we should prefer to obtain our guarantees without too strong assumptions  
342 on the distribution  $p_{real}$ .

## 343 **Broader Impact**

344 There are no foreseen ethical or societal consequences for the research presented herein.



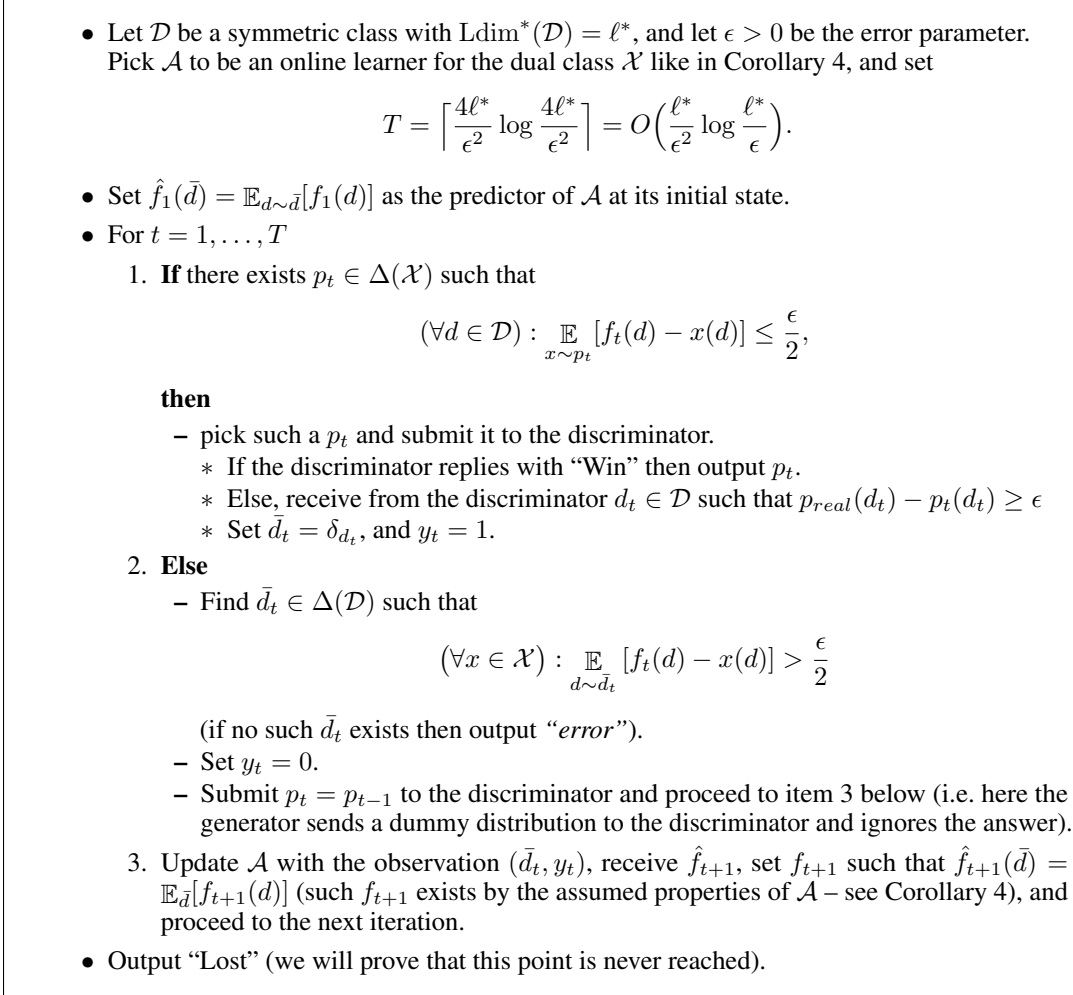

Figure 1: A fooling strategy for the generator with respect to a symmetric discriminating class  $\mathcal{D}$ .

## 345 References

- 346 [1] Noga Alon, Roi Livni, Maryanthe Malliaris, and Shay Moran. Private PAC learning implies  
 347 finite littlestone dimension. *CoRR*, abs/1806.00949, 2018.
- 348 [2] Sanjeev Arora, Rong Ge, Yingyu Liang, Tengyu Ma, and Yi Zhang. Generalization and  
 349 equilibrium in generative adversarial nets (gans). In *Proceedings of the 34th International  
 350 Conference on Machine Learning, ICML 2017, Sydney, NSW, Australia, 6-11 August 2017*,  
 351 pages 224–232, 2017.
- 352 [3] Sanjeev Arora, Andrej Risteski, and Yi Zhang. Do gans learn the distribution? some theory and  
 353 empirics. 2018.
- 354 [4] Yu Bai, Tengyu Ma, and Andrej Risteski. Approximability of discriminators implies diversity  
 355 in gans. *arXiv preprint arXiv:1806.10586*, 2018.
- 356 [5] Amos Beimel, Kobbi Nissim, and Uri Stemmer. Private learning and sanitization: Pure  
 357 vs. approximate differential privacy. In *Approximation, Randomization, and Combinatorial  
 358 Optimization. Algorithms and Techniques*, pages 363–378. Springer, 2013.
- 359 [6] Shai Ben-David, Dávid Pál, and Shai Shalev-Shwartz. Agnostic online learning. In *COLT 2009  
 360 - The 22nd Conference on Learning Theory, Montreal, Quebec, Canada, June 18-21, 2009*,  
 361 2009.
- 362 [7] Siddharth Bhaskar. Thicket density. *arXiv preprint arXiv:1702.03956*, 2017.

- 363 [8] Avrim Blum, Katrina Ligett, and Aaron Roth. A learning theory approach to noninteractive  
364 database privacy. *Journal of the ACM (JACM)*, 60(2):12, 2013.
- 365 [9] Mark Bun, Roi Livni, and Shay Moran. An equivalence between private classification and  
366 online prediction. *arXiv preprint arXiv:2003.00563*, 2020.
- 367 [10] Mark Bun, Kobbi Nissim, Uri Stemmer, and Salil P. Vadhan. Differentially private release and  
368 learning of threshold functions. In *FOCS*, pages 634–649. IEEE Computer Society, 2015.
- 369 [11] Nicolo Cesa-Bianchi and Gábor Lugosi. *Prediction, learning, and games*. Cambridge university  
370 press, 2006.
- 371 [12] Hunter Chase and James Freitag. Model theory and machine learning. *arXiv preprint*  
372 *arXiv:1801.06566*, 2018.
- 373 [13] Irit Dinur and Kobbi Nissim. Revealing information while preserving privacy. In *Proceedings*  
374 *of the Twenty-Second ACM SIGACT-SIGMOD-SIGART Symposium on Principles of Database*  
375 *Systems, June 9-12, 2003, San Diego, CA, USA*, pages 202–210, 2003.
- 376 [14] Cynthia Dwork, Frank McSherry, Kobbi Nissim, and Adam Smith. Calibrating noise to  
377 sensitivity in private data analysis. In *Theory of cryptography conference*, pages 265–284.  
378 Springer, 2006.
- 379 [15] Cynthia Dwork, Moni Naor, Omer Reingold, Guy N Rothblum, and Salil Vadhan. On the  
380 complexity of differentially private data release: efficient algorithms and hardness results. In  
381 *Proceedings of the forty-first annual ACM symposium on Theory of computing*, pages 381–390.  
382 ACM, 2009.
- 383 [16] Cynthia Dwork, Aaron Roth, et al. The algorithmic foundations of differential privacy. *Founda-*  
384 *tions and Trends® in Theoretical Computer Science*, 9(3–4):211–407, 2014.
- 385 [17] Marco Gaboardi, Emilio Jesús Gallego Arias, Justin Hsu, Aaron Roth, and Zhiwei Steven  
386 Wu. Dual query: Practical private query release for high dimensional data. In *International*  
387 *Conference on Machine Learning*, pages 1170–1178, 2014.
- 388 [18] Ian Goodfellow. Nips 2016 tutorial: Generative adversarial networks. *arXiv preprint*  
389 *arXiv:1701.00160*, 2016.
- 390 [19] Ian Goodfellow, Jean Pouget-Abadie, Mehdi Mirza, Bing Xu, David Warde-Farley, Sherjil  
391 Ozair, Aaron Courville, and Yoshua Bengio. Generative adversarial nets. In *Advances in neural*  
392 *information processing systems*, pages 2672–2680, 2014.
- 393 [20] Paulina Grnarova, Kfir Y. Levy, Aurélien Lucchi, Thomas Hofmann, and Andreas Krause. An  
394 online learning approach to generative adversarial networks. *CoRR*, abs/1706.03269, 2017.
- 395 [21] Anupam Gupta, Moritz Hardt, Aaron Roth, and Jonathan Ullman. Privately releasing con-  
396 junctions and the statistical query barrier. *SIAM Journal on Computing*, 42(4):1494–1520,  
397 2013.
- 398 [22] Anupam Gupta, Aaron Roth, and Jonathan Ullman. Iterative constructions and private data  
399 release. In *Theory of cryptography conference*, pages 339–356. Springer, 2012.
- 400 [23] Moritz Hardt, Katrina Ligett, and Frank McSherry. A simple and practical algorithm for  
401 differentially private data release. In *Advances in Neural Information Processing Systems*, pages  
402 2339–2347, 2012.
- 403 [24] Justin Hsu, Aaron Roth, and Jonathan Ullman. Differential privacy for the analyst via private  
404 equilibrium computation. In *Proceedings of the forty-fifth annual ACM symposium on Theory*  
405 *of computing*, pages 341–350. ACM, 2013.
- 406 [25] Phillip Isola, Jun-Yan Zhu, Tinghui Zhou, and Alexei A Efros. Image-to-image translation with  
407 conditional adversarial networks. In *Proceedings of the IEEE conference on computer vision*  
408 *and pattern recognition*, pages 1125–1134, 2017.
- 409 [26] Shiva Prasad Kasiviswanathan, Homin K Lee, Kobbi Nissim, Sofya Raskhodnikova, and Adam  
410 Smith. What can we learn privately? *SIAM Journal on Computing*, 40(3):793–826, 2011.
- 411 [27] John L Kelley. *General topology*. Courier Dover Publications, 2017.
- 412 [28] Diederik P. Kingma and Max Welling. Auto-encoding variational bayes. In *2nd International*  
413 *Conference on Learning Representations, ICLR 2014, Banff, AB, Canada, April 14-16, 2014,*  
414 *Conference Track Proceedings*, 2014.

- 415 [29] Naveen Kodali, Jacob Abernethy, James Hays, and Zsolt Kira. On convergence and stability of  
416 gans. *arXiv preprint arXiv:1705.07215*, 2017.
- 417 [30] Nick Littlestone. Learning quickly when irrelevant attributes abound: A new linear-threshold  
418 algorithm (extended abstract). In *28th Annual Symposium on Foundations of Computer Science,*  
419 *Los Angeles, California, USA, 27-29 October 1987*, pages 68–77, 1987.
- 420 [31] Alfred Müller. Integral probability metrics and their generating classes of functions. *Advances*  
421 *in Applied Probability*, 29(2):429–443, 1997.
- 422 [32] Scott E. Reed, Zeynep Akata, Xinchun Yan, Lajanugen Logeswaran, Bernt Schiele, and Honglak  
423 Lee. Generative adversarial text to image synthesis. In *Proceedings of the 33rd International*  
424 *Conference on Machine Learning, ICML 2016, New York City, NY, USA, June 19-24, 2016*,  
425 pages 1060–1069, 2016.
- 426 [33] Danilo Jimenez Rezende, Shakir Mohamed, and Daan Wierstra. Stochastic backpropagation  
427 and approximate inference in deep generative models. In *International Conference on Machine*  
428 *Learning*, pages 1278–1286, 2014.
- 429 [34] Walter Rudin. *Functional analysis. International series in pure and applied mathematics.*  
430 McGraw-Hill, Inc., New York, 1991.
- 431 [35] Walter Rudin. *Real and complex analysis.* Tata McGraw-Hill Education, 2006.
- 432 [36] niel Seth, Roth Aaron, and Wu Zhiwei. How to use heuristics for differential privacy. *arXiv*  
433 *preprint arXiv:1811.07765*, 2018.
- 434 [37] Shai Shalev-Shwartz and Shai Ben-David. *Understanding Machine Learning: From Theory to*  
435 *Algorithms.* Cambridge University Press, New York, NY, USA, 2014.
- 436 [38] Shai Shalev-Shwartz et al. Online learning and online convex optimization. *Foundations and*  
437 *Trends® in Machine Learning*, 4(2):107–194, 2012.
- 438 [39] Saharon Shelah. *Classification theory: and the number of non-isomorphic models*, volume 92.  
439 Elsevier, 1990.
- 440 [40] Jonathan Ullman and Salil Vadhan. Pcps and the hardness of generating private synthetic data.  
441 In *Theory of Cryptography Conference*, pages 400–416. Springer, 2011.
- 442 [41] Salil Vadhan. The complexity of differential privacy. In *Tutorials on the Foundations of*  
443 *Cryptography*, pages 347–450. Springer, 2017.
- 444 [42] V.N. Vapnik and A.Ya. Chervonenkis. On the uniform convergence of relative frequencies of  
445 events to their probabilities. *Theory Probab. Appl.*, 16:264–280, 1971.
- 446 [43] Raymond A Yeh, Chen Chen, Teck Yian Lim, Alexander G Schwing, Mark Hasegawa-Johnson,  
447 and Minh N Do. Semantic image inpainting with deep generative models. In *Proceedings of*  
448 *the IEEE Conference on Computer Vision and Pattern Recognition*, pages 5485–5493, 2017.

## 449 **A Background**

### 450 **A.1 Prelimineries**

451 In this section we review some of the basic notations we will use as well as discuss further some  
452 standard definitions and notions in differential privacy and online learning.

453 We continue here the convention of Section 2, and in this section we let  $\mathcal{W}$  denote the domain and  
454  $\mathcal{H} \subseteq \{0, 1\}^{\mathcal{W}}$  to denote the functions class.

#### 455 **A.1.1 Notations**

456 For a finite<sup>4</sup> set  $\mathcal{W}$ , let  $\Delta(\mathcal{W})$  denote the space of probability measures over  $\mathcal{W}$ . Note that  $\mathcal{W}$   
457 naturally embeds in  $\Delta(\mathcal{W})$  by identifying  $w \in \mathcal{W}$  with the Dirac measure  $\delta_w$  supported on  $w$ .  
458 Therefore, every  $f : \Delta(\mathcal{W}) \rightarrow \mathbb{R}$  induces a  $\mathcal{W} \rightarrow \mathbb{R}$  function via this identification. In the other

---

<sup>4</sup>The same notation will be used for infinite classes also. However we will properly define the the measure space and  $\sigma$ -algebra at later sections when we extend the results to the infinite regime.

459 direction, every  $f : \mathcal{W} \rightarrow \mathbb{R}$  naturally extends to a linear<sup>5</sup> map  $\hat{f} : \Delta(\mathcal{W}) \rightarrow \mathbb{R}$  which is defined  
 460 by  $\hat{f}(p) = \mathbb{E}_p[f]$  for every  $p \in \Delta(\mathcal{W})$ .

461 We will often deal with boolean functions  $f : \mathcal{W} \rightarrow \{0, 1\}$ , and in some cases we will treat  $f$  as  
 462 the subset of  $\mathcal{W}$  that it indicates. For example, given a distribution  $p \in \Delta(\mathcal{W})$  we will use  $p(f)$  to  
 463 denote the measure of the subset that  $f$  indicates (i.e.  $p(f) = \Pr_{w \sim p}[f(w) = 1]$ ). Given a class of  
 464 functions  $F \subseteq \{0, 1\}^{\mathcal{W}}$ , its *dual class* is a class of  $F \rightarrow \{0, 1\}$  functions, where each function in it is  
 465 associated with  $w \in \mathcal{W}$  and acts on  $F$  according to the rule  $f \mapsto f(w)$ . By a slight abuse of notation  
 466 we will denote the dual class with  $\mathcal{W}$  and use  $w(f)$  to denote the function associated with  $w$  (i.e.  
 467  $w(f) := f(w)$  for every  $f \in F$ ).

468 Given a sample  $S = (w_1, \dots, w_m) \in \mathcal{W}^m$ , the *empirical distribution* induced by  $S$  is the discrete  
 469 distribution  $p_S$  defined by  $p_S(w) = \frac{1}{m} \sum_{i=1}^m 1[w = w_i]$ .

### 470 A.1.2 Basic properties of Differential Privacy

471 We will use the following three basic properties of algorithmic privacy.

472 **Lemma 1** (Post-Processing (Lemma 2.1 in [41])). *If  $M : \mathcal{W}^m \rightarrow \Sigma$  is  $(\alpha, \beta)$ -differentially private  
 473 and  $F : \Sigma \rightarrow Z$  is any (possibly randomized) function, then  $F \circ M : \mathcal{W}^m \rightarrow Z$  is  $(\alpha, \beta)$ -differentially  
 474 private.*

475 **Lemma 2** (Composition (Lemma 2.3 in [41])). *Let  $M_1, \dots, M_k : \mathcal{W}^m \rightarrow \Sigma$  be  $(\alpha, \beta)$ -differentially  
 476 private algorithms, and define  $M : \mathcal{W}^M \rightarrow \Sigma^k$  by*

$$M(\Omega) = (M_1(\Omega), M_2(\Omega), \dots, M_k(\Omega)).$$

477 *Then,  $M$  is  $(k\alpha, k\beta)$ -differentially private.*

478 **Lemma 3** (Privacy Amplification (Lemma 4.12 in [10])). *Let  $\alpha \leq 1$  and let  $M$  be a  $(\alpha, \beta)$ -  
 479 differentially private algorithm operating on databases of size  $u$ . For  $v > 2u$ , construct an algorithm  
 480  $M'$  that on input database  $\Omega \in \mathcal{W}^v$  subsamples (with replacement)  $u$  points from  $\Omega$  and runs  $M$  on  
 481 the result. Then  $M'$  is  $(\tilde{\alpha}, \tilde{\beta})$ -differentially private for*

$$\tilde{\alpha} = 6\alpha u/v \quad \tilde{\beta} = \exp(6\alpha u/v) \frac{4u}{v} \beta.$$

482 We remark that the requirement  $\alpha \leq 1$  can be replaced by  $\alpha \leq c$  for any constant  $c$  at the expense of  
 483 increasing the constant factors in the definitions of  $\tilde{\alpha}, \tilde{\beta}$ . This follows by the same argument that is  
 484 used to prove Lemma 3 in [10].

### 485 A.1.3 Littlestone Dimension and Online Learning

486 We begin by recalling the basic notion of Littlestone dimension.

487 **Littlestone Dimension** The Littlestone dimension is a combinatorial parameter that characterizes  
 488 regret bounds in online learning, but also have recently been related to other concepts in machine  
 489 learning such as differentially private learning [1]. Perhaps surprisingly, the notion also plays a  
 490 central role in Model Theory ([39, 12], and see [1] for further discussion).

491 The definition of this parameter uses the notion of *mistake-trees*: these are binary decision trees whose  
 492 internal nodes are labelled by elements of  $\mathcal{W}$ . Any root-to-leaf path in a mistake tree can be described  
 493 as a sequence of examples  $(w_1, y_1), \dots, (w_d, y_d)$ , where  $w_i$  is the label of the  $i$ 'th internal node in the  
 494 path, and  $y_i = +1$  if the  $(i+1)$ 'th node in the path is the right child of the  $i$ 'th node, and otherwise  
 495  $y_i = 0$ . We say that a tree  $T$  is *shattered* by  $\mathcal{H}$  if for any root-to-leaf path  $(w_1, y_1), \dots, (w_d, y_d)$  in  $T$   
 496 there is  $h \in \mathcal{H}$  such that  $h(w_i) = y_i$ , for all  $i \leq d$ .

497 The Littlestone dimension of  $\mathcal{H}$ , denoted by  $\text{Ldim}(\mathcal{H})$ , is the maximum depth of a complete tree that  
 498 is shattered by  $\mathcal{H}$ .

499 The *dual Littlestone Dimension* which we will denote by  $\text{Ldim}^*(\mathcal{H})$  is the Littlestone dimension of  
 500 the dual class (i.e. we consider  $\mathcal{W}$  as the hypothesis class and  $\mathcal{H}$  is the domain). We will use the  
 501 following fact:

<sup>5</sup>A function  $g : \Delta(\mathcal{W}) \rightarrow \mathbb{R}$  is *linear* if  $g(\alpha p_1 + (1 - \alpha)p_2) = \alpha g(p_1) + (1 - \alpha)g(p_2)$ , for all  $\alpha \in [0, 1]$

502 **Lemma 4.** [Corollary 3.6 in [7]] Every class  $\mathcal{H}$  has a finite Littlestone dimension if and only if it  
 503 has a finite dual Littlestone dimension. Moreover we have the following bound:

$$\text{Ldim}^*(\mathcal{H}) \leq 2^{2^{\text{Ldim}(\mathcal{H})+2}} - 2$$

504 **Online Learning** The Online learnability of Littlestone classes has been established by [30] in  
 505 the realizable case and by [6] in the agnostic case. Ben-David et al's [6] agnostic *Standard Online*  
 506 *Algorithm* (SOA) will serve as a workhorse for our main results and we thus recall the online learning  
 507 setting and state the relevant results. For a more exhaustive survey on online learning we refer the  
 508 reader to [11, 38].

509 In the a binary online setting we assume a domain  $\mathcal{W}$  and a space of hypotheses  $\mathcal{H} \subseteq \{0, 1\}^{\mathcal{W}}$ .  
 510 We consider the following *oblivious* setting which can be described as a repeated game between a  
 511 learner  $L$  and an adversary continuing for  $T$  rounds; the *horizon*  $T$  is fixed and known in advanced  
 512 to both players. At the beginning of the game, the adversary picks a sequence of labelled examples  
 513  $(w_t, y_t)_{t=1}^T \subseteq \mathcal{W} \times \{0, 1\}$ . Then, at each round  $t \leq T$ , the learner chooses (perhaps randomly) a  
 514 mapping  $f_t : \mathcal{W} \rightarrow [0, 1]$  and then gets to observe the labelled example  $(w_t, y_t)$ . The performance of  
 515 the learner  $L$  is measured by her *regret*, which is the difference between her loss and the loss of the  
 516 best hypothesis in  $\mathcal{H}$ :

$$\text{REGRET}_T(L; \{w_t, y_t\}_{t=1}^T) = \sum_{t=1}^T \mathbb{E} [|f_t(w_t) - y_t|] - \min_{h \in \mathcal{H}} \sum_{t=1}^T |h(w_t) - y_t|, \quad (4)$$

517 where the expectation is taken over the randomness of the learner. Define

$$\text{REGRET}_T(L) = \sup_{\{w_t, y_t\}_{t=1}^T} \text{REGRET}_T(L; \{w_t, y_t\}_{t=1}^T).$$

518 The following result establishes that Littlestone classes are learnable in this setting:

519 **Theorem 3.** [[6]] Let  $\mathcal{H}$  be a class with Littlestone dimension  $\ell$  and let  $T$  be the horizon. Then,  
 520 there exists an online learning algorithm  $L$  such that

$$\text{REGRET}_T(L) \leq \sqrt{\frac{1}{2} \ell \cdot T \log T}$$

521 We will need the following corollary of Theorem 3. Recall that  $\Delta(\mathcal{W})$  denotes the class of distri-  
 522 butions over  $\mathcal{W}$ , and that every  $f : \mathcal{W} \rightarrow [0, 1]$  extends linearly to  $\Delta(\mathcal{W})$  by  $\hat{f}(p) = \mathbb{E}_{w \sim p}[f(w)]$ .  
 523 The next statement concerns an online setting where the labelled example are of the form  
 524  $(p_t, y_t) \in \Delta(\mathcal{W}) \times \{0, 1\}$ , and the regret of a learner  $L$  with respect to  $\mathcal{H} \subseteq \{0, 1\}^{\mathcal{W}}$  is defined by  
 525 replacing each  $h$  by its linear extension  $\hat{h}$ :

$$\begin{aligned} \text{REGRET}_T(L; \{p_t, y_t\}_{t=1}^T) &= \sum_{t=1}^T \mathbb{E} [|f_t(p_t) - y_t|] - \min_{h \in \mathcal{H}} \sum_{t=1}^T |\hat{h}(p_t) - y_t| \\ &= \sum_{t=1}^T \mathbb{E} [|f_t(p_t) - y_t|] - \min_{h \in \mathcal{H}} \sum_{t=1}^T \left| \mathbb{E}_{x \sim p_t} [h(w)] - y_t \right| \end{aligned}$$

526 **Corollary 4.** Let  $\mathcal{H}$  be a finite class with Littlestone dimension  $\ell$  and let  $T$  be the horizon. Then,  
 527 there exists a deterministic online learner  $L$  that receives labelled examples from the domain  $\Delta(\mathcal{W})$   
 528 such that

$$\text{REGRET}_T(L) \leq \sqrt{\frac{1}{2} \ell T \log T}$$

529 Moreover, at each iteration  $t$  the predictor used by  $L$  is of the form  $\hat{f}_t(p) = \mathbb{E}_{w \sim p}[f_t(w)]$ , where  $f_t$   
 530 is some  $\mathcal{W} \rightarrow [0, 1]$  function.

531 Corollary 4 follows from Theorem 3; see Appendix C for a proof.

## 532 B Proofs

### 533 B.1 Proof of Theorem 2

#### 534 B.1.1 Upper Bound: Proof of Item 1

535 In this section we prove the upper bound presented in Theorem 2 in the case where  $\mathcal{X}$  is finite (and in  
 536 turn,  $\mathcal{D} \subseteq \{0, 1\}^X$  is also finite). As discussed though, the bounds will be independent of the domain  
 537 size. The general case is proven in a similar fashion but is somewhat more delicate. The general  
 538 proof is then given in Appendix D.

539 First note that we may assume without loss of generality that  $\mathcal{D}$  is symmetric. Indeed, if  $\mathcal{D}$  is not  
 540 symmetric then we may replace  $\mathcal{D}$  with  $\mathcal{D} \cup (1 - \mathcal{D})$ , noting that this does not affect the Sequential  
 541 game, namely (i)  $\text{IPM}_{\mathcal{D}} = \text{IPM}_{\mathcal{D} \cup (1 - \mathcal{D})}$  (and so the goal of the generator remains the same), and  
 542 (ii) the set of distinguishers the discriminator may use remains the same (recall that the discriminator  
 543 is allowed to use distinguishers from  $1 - \mathcal{D}$ ). Also, one can verify that this modification does not  
 544 change the dual Littlestone dimension (i.e.  $\text{Ldim}^*(\mathcal{D}) = \text{Ldim}^*(\mathcal{D} \cup (1 - \mathcal{D}))$ ).

545 Therefore, we assume  $\mathcal{D}$  is a finite symmetric class with dual Littlestone dimension  $\ell^*$ . The generator  
 546 used in the proof is depicted in Fig. 1. The generator uses an online learner  $\mathcal{A}$  for the dual class  $\mathcal{X}$   
 547 with domain  $\Delta(\mathcal{D})$  as in Corollary 4, where the horizon is set to be  $T = \lceil \frac{4\ell^*}{\epsilon^2} \log \frac{4\ell^*}{\epsilon^2} \rceil$ . Let  $D$  be  
 548 an arbitrary discriminator, let  $p_{\text{real}} \in \Delta(\mathcal{X})$  be the target distribution, and let  $\epsilon > 0$  be the error  
 549 parameter. The proof follows from the next lemma:

550 **Lemma 5.** *Let  $\mathcal{D}$  be a finite set of discriminators, let  $f : \mathcal{D} \rightarrow [0, 1]$ , Assume that,*

$$(\forall p \in \Delta(\mathcal{X})) (\exists d \in \mathcal{D}) : \mathbb{E}_{x \sim p} [f(d) - x(d)] > \epsilon/2.$$

551 *Then:*

$$(\exists \bar{d} \in \Delta(\mathcal{D})) (\forall x \in \mathcal{X}) : \mathbb{E}_{d \sim \bar{d}} [f(d) - x(d)] > \epsilon/2.$$

552 Before proving this lemma, we show how it implies the desired upper bound on the round complexity.  
 553 We first argue that the algorithm never outputs “error”: indeed, since  $\mathcal{A}$  only uses predictors of the  
 554 form  $\hat{f}_t(\bar{d}) = \mathbb{E}_{\bar{d}}[f_t]$ , Lemma 5 implies that whenever Item 2 in the “For” loop is reached then an  
 555 appropriate  $\bar{d}_t \in \Delta(\mathcal{D})$  exists and therefore the algorithm never outputs “error”.

556 Next, we bound the number of rounds: let  $T' \leq T$  be the number of iterations performed when the  
 557 generator  $G$  runs against the discriminator  $D$ . The only way for the generator to lose is if the “For”  
 558 loop ends without its winning and  $T' = T$ . Thus, It suffices to show that  $T' < T$ . The argument  
 559 proceeds by showing that the regret of  $\mathcal{A}$  in each iteration  $t \leq T'$  increases by at least  $\epsilon/2$ . This,  
 560 combined with the bound on  $\mathcal{A}$ ’s regret (from Corollary 4) will yield the desired bound.

561 We begin by analyzing the increase in  $\mathcal{A}$ ’s regret. Let  $(\bar{d}_1, y_1), \dots, (\bar{d}_{T'}, y_{T'})$  and  $\hat{f}_1, \dots, \hat{f}_{T'}$  be the  
 562 sequences obtained during the execution of the algorithm as defined in Fig. 1. Recall from Corollary 4  
 563 that  $\hat{f}_t(\bar{d}) = \mathbb{E}_{\bar{d} \sim \bar{d}_t}[f_t(d)]$ , where  $f_t : \mathcal{D} \rightarrow [0, 1]$ . We claim that the following holds:

$$(\forall t \leq T') : \begin{cases} \mathbb{E}_{\bar{d} \sim \bar{d}_t} [p_{\text{real}}(d) - f_t(d)] \geq \frac{\epsilon}{2} & \text{if } y_t = 1, \\ \mathbb{E}_{\bar{d} \sim \bar{d}_t} [f_t(d) - p_{\text{real}}(d)] \geq \frac{\epsilon}{2} & \text{if } y_t = 0. \end{cases} \quad (5)$$

564 Indeed, if  $y_t = 1$  then by Fig. 1, the chosen  $p_t$  satisfies

$$(\forall d \in \mathcal{D}) : f_t(d) - \mathbb{E}_{x \sim p_t} [x(d)] \leq \frac{\epsilon}{2}.$$

565 Since the discriminator replies with  $d_t$  such that  $p_{\text{real}}(d_t) - p_t(d_t) \geq \epsilon$ , and  $\bar{d}_t = \delta_{d_t}$ , it follows that

$$\begin{aligned} \mathbb{E}_{\bar{d} \sim \bar{d}_t} [p_{\text{real}}(d) - f_t(d)] &= \mathbb{E}_{\bar{d} \sim \bar{d}_t} [p_{\text{real}}(d_t)] - \mathbb{E}_{\bar{d} \sim \bar{d}_t} [f_t(d_t)] \\ &= p_{\text{real}}(d_t) - f_t(d_t) && \text{(because } \bar{d}_t = \delta_{d_t}\text{)} \\ &\geq \mathbb{E}_{x \sim p_{\text{real}}} [x(d_t)] - \left( \mathbb{E}_{x \sim p_t} [x(d_t)] + \epsilon/2 \right) \\ &= p_{\text{real}}(d_t) - (p_t(d_t) + \epsilon/2) \\ &\geq \frac{\epsilon}{2}, \end{aligned}$$

566 which is the first case in Eq. (5). Next consider the case when  $y_t = 0$ . Since the algorithm never  
 567 outputs “error”, Fig. 1 implies that:

$$(\forall x \in \mathcal{X}) : \hat{f}_t(\bar{d}_t) - \mathbb{E}_{d \sim \bar{d}_t} [x(d)] > \frac{\epsilon}{2}.$$

568 Therefore, by linearity of expectation,  $\mathbb{E}_{d \sim \bar{d}_t} [f_t(d) - p_{real}(d)] = \hat{f}_t(\bar{d}_t) - \mathbb{E}_{d \sim \bar{d}_t} [p_{real}(d)] \geq \frac{\epsilon}{2}$ ,  
 569 which amounts to the second case in Eq. (5).

570 We are now ready to conclude the proof by showing that  $T' < T$ . Assume towards contradiction that  
 571  $T' = T$ . Therefore, by Eq. (5):

$$\begin{aligned} T \frac{\epsilon}{2} &\leq \sum_{t=1}^T \left| \mathbb{E}_{d \sim \bar{d}_t} [p_{real}(d) - f_t(d)] \right| \\ &= \sum_{t=1}^T |y_t - \mathbb{E}_{d \sim \bar{d}_t} [f_t(d)]| - |y_t - \mathbb{E}_{d \sim \bar{d}_t} [p_{real}(d_t)]| \\ &\quad (y_t = 1 \iff \mathbb{E}_{d \sim \bar{d}_t} [p_{real}(d_t)] \geq \mathbb{E}_{d \sim \bar{d}_t} [f_t(d)]) \\ &= \sum_{t=1}^T |y_t - \hat{f}_t(\bar{d}_t)| - \mathbb{E}_{x \sim p_{real}} \left[ |y_t - \mathbb{E}_{d \sim \bar{d}_t} x(d_t)| \right] \\ &\leq \sum_{t=1}^T |y_t - f_t(\bar{d}_t)| - \min_{x \in \mathcal{X}} |y_t - \mathbb{E}_{d \sim \bar{d}_t} [x(d)]| \\ &\leq \text{REGRET}_T(\mathcal{A}). \\ &\leq \sqrt{\frac{1}{2} \ell^* T \log T} \end{aligned}$$

572 Thus, we obtain that  $\frac{T}{\log T} \leq \frac{2\ell^*}{\epsilon^2}$ , however our choice of  $T = \lceil \frac{4\ell^*}{\epsilon^2} \log \frac{4\ell^*}{\epsilon^2} \rceil$  ensures that this is  
 573 impossible. Indeed:

$$\begin{aligned} \frac{T}{\log T} &\geq \frac{\frac{4\ell^*}{\epsilon^2} \log \frac{4\ell^*}{\epsilon^2}}{\log \frac{4\ell^*}{\epsilon^2} + \log \log \frac{4\ell^*}{\epsilon^2}} \\ &= \frac{\frac{4\ell^*}{\epsilon^2}}{1 + \frac{\log \log \frac{4\ell^*}{\epsilon^2}}{\log \frac{4\ell^*}{\epsilon^2}}} \\ &> \frac{\frac{4\ell^*}{\epsilon^2}}{2} \\ &= \frac{2\ell^*}{\epsilon^2}. \end{aligned}$$

574 This finishes the proof of Item 1.

575 We end this section by proving Lemma 5.

576 **Proof of Lemma 5.** The proof hinges on Von Neuman’s Minimax Theorem. Let  $D, f$  as in the  
 577 formulation of the theorem, and consider the following zero-sum game: the pure strategies of the  
 578 maximizer are indexed by  $d \in \mathcal{D}$ , the pure strategies of the minimizer are indexed by  $x \in X$ , and the  
 579 payoff (for pure strategies) is defined by  $m(d, x) = f(d) - x(d)$ . Note that the payoff function for  
 580 mixed strategies  $\bar{d} \in \Delta(\mathcal{D}), p \in \Delta(\mathcal{X})$  satisfies

$$m(\bar{d}, p) = \mathbb{E}_{x \sim p} [\hat{f}(\bar{d}) - \mathbb{E}_{d \sim \bar{d}} x(d)] = \mathbb{E}_{d \sim \bar{d}} [f(d) - \mathbb{E}_{x \sim p} [x(d)]].$$

581 We next apply Von Neuman’s Minimax Theorem on this game (Here we use the assumption that  $\mathcal{X}$   
 582 and, in turn,  $\mathcal{D}$  are finite). The premise of the lemma amounts to

$$\min_{p \in \Delta(\mathcal{X})} \max_{d \in \mathcal{D}} m(d, p) > \epsilon/2.$$

583 Therefore, by the Minimax Theorem also

$$\max_{\bar{d} \in \Delta(\mathcal{D})} \min_{x \in \mathcal{X}} m(\bar{d}, x) > \epsilon/2,$$

584 which amounts to the conclusion of the lemma.  $\square$

585 **A remark.** A natural variant of the Sequential setting follows by letting the discriminator  $D$  to  
 586 adaptively change the target distribution  $p_{real}$  as the game proceeds ( $D$  would still be required  
 587 to maintain the existence of a distribution  $p_{real}$  which is consistent with all of its answers). This  
 588 modification allows for stronger discriminators and therefore, potentially, for a more restrictive notion  
 589 of Sequential–Foolability. However, the above proof extends to this setting verbatim.

### 590 B.1.2 Lower Bound: Proof of Item 2

591 Let  $\mathcal{D}$  be a class as in the theorem statement, let  $G$  be a generator for  $\mathcal{D}$ , and let  $\epsilon < \frac{1}{2}$ . We will  
 592 construct a discriminator  $D$  and a target distribution  $p_{real}$  such that  $G$  requires at least  $\frac{\ell^*}{2}$  rounds in  
 593 order to find  $p$  such that  $\text{IPM}_{\mathcal{D}}(p, p_{real}) \leq \epsilon$ .

594 To this end, pick a shattered mistake-tree  $\mathcal{T}$  of depth  $\ell^*$  whose internal nodes are labelled by elements  
 595 of  $\mathcal{D}$  and whose leaves are labelled by elements of  $\mathcal{X}$ .

596 **The discriminator.** The target distribution will be a Dirac distribution  $\delta_x$  where  $x$  is one of the  
 597 labels of  $\mathcal{T}$ 's leaves. We will use the following discriminator  $D$  which is defined whenever  $p_{real}$  is  
 598 one of these distributions: assume that  $p_{real} = \delta_x$ , and consider all functions in  $\mathcal{D}$  that label the path  
 599 from the root towards the leaf whose label is  $x$ ,

$$d_1, d_2, \dots, d_{\ell^*}.$$

600 Let  $p_1$  be the distribution the generator submitted in the first round. Then the discriminator picks the  
 601 first  $i$  such that  $|p_t(d_1) - p_{real}(d_1)| > \epsilon$ , and sends the generator either  $d_i$  or  $1 - d_i$  according to the  
 602 convention in Eq. (3). If no such  $d_i$  exists, the discriminator outputs WIN. Similarly, at round  $t$  let  
 603  $i_{t-1}$  denote the index of the distinguisher sent in the previous round; then, the discriminator acts the  
 604 same with the modification that it picks the first  $i_{t-1} + 1 \leq i \leq \ell^*$  such that  $|p_t(d_i) - p_{real}(d_i)| > \epsilon$ .

605 **Analysis.** The following claim implies that for every generator  $G$ , there exists a distribution  $\delta_x$   
 606 such that if  $p_{real} = \delta_x$  then the above discriminator  $D$  forces  $G$  to play at least  $\ell^*/2$  rounds.

607 **Claim 1.** *Let  $G$  be a generator for  $\mathcal{D}$ . Pick  $p_{real}$  uniformly at random from the set  $\{\delta_x : x$   
 608  $x$  labels a leaf in  $\mathcal{T}\}$ . Then the expected number of rounds in the Sequential game when  $G$  is the  
 609 generator and  $D = D(\mathcal{T})$  is the discriminator is at least  $\frac{\ell^*}{2}$ .*

610 *Proof.* For every  $i \leq \ell^*$ , let  $X_i$  denote the indicator of the event that the  $i$ 'th function on the path  
 611 towards the leaf corresponding to  $p_{real}$  was used by  $D$  as a distinguisher. Note that the number of  
 612 rounds  $X$  satisfies  $X = \sum_{i=1}^{\ell^*} X_i$ . Thus, by linearity of expectation it suffices to argue that

$$\mathbb{E}[X_i] = \Pr[X_i = 1] \geq \frac{1}{2}.$$

613 Consider  $X_1$ : let  $p_1$  denote the first distribution submitted by  $G$ . Note that  $X_1 = 1$  if

614 (i)  $p_1(d_1) \geq \frac{1}{2}$  and the leaf labelled  $x$  belongs to the left subtree from the root, or

615 (ii)  $p_1(d_1) < \frac{1}{2}$  and the leaf labelled  $x$  belongs to the right subtree from the root.

616 In either way  $\Pr[X_1 = 1] \geq \frac{1}{2}$ , since this leaf is drawn uniformly. Similarly, for every conditioning on  
 617 the values of  $X_1, \dots, X_{i-1}$  we have  $\Pr[X_i = 1 | X_1 \dots X_{i-1}] \geq \frac{1}{2}$  (follows from the same argument  
 618 applied on subtrees corresponding to the conditioning). This yields that  $\mathbb{E}[X_i] = \Pr[X_i = 1] \geq \frac{1}{2}$   
 619 for every  $i$  as required.

620  $\square$



621 **B.2 Proof of Theorem 1**

622 **Proof Roadmap.** We will show the following entailments:  $1 \Rightarrow 2 \Rightarrow 3 \Rightarrow 1$ . Then, given the equivalence between Items 1 to 3 we will show that  $1 \Leftrightarrow 4$ . This will conclude the proof.

624 **Overview of  $1 \Rightarrow 2$ .** We next overview the derivation of  $1 \Rightarrow 2$  which is the most involved derivation. 625 Let  $p_{real}$  denote the target distribution we wish to fool. The argument relies on the following simple 626 observation: let  $S$  be a sufficiently large independent sample from  $p_{real}$ . Then, it suffices to privately 627 output a distribution  $p_{syn}$  such that  $\text{IPM}_{\mathcal{D}}(p_{syn}, p_S) \leq \frac{\epsilon}{2}$ , where  $p_S$  is the empirical distribution. 628 Indeed, if  $S$  is sufficiently large then by standard uniform convergence bounds:  $\text{IPM}_{\mathcal{D}}(p_S, p_{real}) \leq \frac{\epsilon}{2}$ , 629 which implies that  $\text{IPM}_{\mathcal{D}}(p_{syn}, p_{real}) \leq \epsilon$  as required.

630 The output distribution  $p_{syn}$  is constructed using a carefully tailored Sequential-SDG with a *private* 631 *discriminator*  $D$ . That is,  $D$ 's input distribution is the empirical distribution  $p_S$ , and for every 632 submitted distribution  $p_t$ , it either replies with a discriminating function  $d_t$  or with "WIN" if no 633 discriminating function exists. The crucial point is that it does so in a differentially private manner 634 with respect to the input sample  $S$ . The existence of such a discriminator  $D$  follows via the assumed 635 PAP-PAC learner.

636 Once the private discriminator  $D$  is constructed, we turn to find a generator  $G$  with a bounded round 637 complexity. This follows from Theorem 2 and a result by [1, 10]: by [1, 10] PAP-PAC learnability 638 implies a finite Littlestone dimension, and therefore by Theorem 2 there is a generator  $G$  with a 639 bounded round complexity. The desired DP fooling algorithm then follows by letting  $G$  and  $D$  play 640 against each other and outputting the final distribution that  $G$  obtains. The privacy guarantee follows 641 by the *composition lemma* (Lemma 2) which bounds the privacy leakage in terms of the number of 642 rounds (which is bounded by the choice of  $G$ ) and the privacy leakage per round (which is bounded 643 by the choice of  $D$ ).

644 One difficulty that is handled in the proof arises because the discriminator is differentially private 645 and because the PAP-PAC algorithm may err with some probability. Indeed, these prevent  $D$  from 646 satisfying the requirements of a discriminator as defined in the Sequential setting. In particular,  $D$  647 cannot reply deterministically whether  $\text{IPM}_{\mathcal{D}}(p_S, p_t) < \epsilon$  as this could compromise privacy. Also, 648 whenever the assumed PAP-PAC algorithm errs,  $D$  may reply with an illegal distinguisher that does 649 not satisfy Eq. (3).

650 To overcome this difficulty we ensure that  $D$  satisfies the following with high probability: if 651  $\text{IPM}_{\mathcal{D}}(p_S, p_t) > \epsilon$  then  $D$  outputs a legal  $d_t$ , and if  $\text{IPM}_{\mathcal{D}}(p_S, p_t) < \frac{\epsilon}{2}$  then it outputs WIN 652 as required. When  $\frac{\epsilon}{2} \leq \text{IPM}_{\mathcal{D}}(p_S, p_t) \leq \epsilon$  it may either output WIN or a legal discriminator  $d_t$ . As 653 we show in the proof, this behaviour of  $D$  will not affect the correctness of the overall argument.

654 *Proof of Theorem 1.* As discussed, the equivalence is proven by showing:  $1 \Rightarrow 2 \Rightarrow 3 \Rightarrow 1$  and  $1 \Leftrightarrow 4$ .

655  **$1 \Rightarrow 2$ .** Let  $p_{real}$  denote the unknown target distribution and let  $\epsilon_0, \delta_0$  be the error and confidence 656 parameters. Draw independently from  $p_{real}$  a sufficiently large input sample  $S$  of size  $|S|$  to be 657 specified later. At this point we require  $|S|$  to be large enough so that  $\text{IPM}_{\mathcal{D}}(p_{real}, p_S) \leq \frac{\epsilon_0}{2}$  with 658 probability at least  $1 - \frac{\delta_0}{2}$ . By standard uniform convergence bounds ([42]) it suffices to require

$$|S| \geq \Omega\left(\frac{d + \log(1/\delta_0)}{\epsilon_0^2}\right), \quad (6)$$

659 where  $d$  is the VC-dimension of  $\mathcal{D}$  (observe that  $\mathcal{D}$  must have a finite VC dimension as it is PAC 660 learnable). By the triangle inequality, this reduces our goal to privately output a distribution  $p_{syn}$  661 so that  $\text{IPM}_{\mathcal{D}}(p_S, p_{syn}) \leq \frac{\epsilon_0}{2}$  with probability  $1 - \frac{\delta_0}{2}$  (this will imply that  $\text{IPM}_{\mathcal{D}}(p_{real}, p_{syn}) \leq \epsilon_0$  662 with probability  $1 - \delta_0$ ).

663 As explained in the proof outline, the latter task is achieved by a Sequential-SDG which we will 664 next describe. In order to construct the desired Sequential-SDG, we first observe that  $\mathcal{D}$  is Sequential- 665 Foolable. Indeed, by Corollary 2 it suffices to argue that  $\mathcal{D}$  has a finite Littlestone dimension, which 666 follows by [1] since  $\mathcal{D}$  is privately learnable.

667 Now, pick a generator  $G$  that fools  $\mathcal{D}$  with round complexity  $T(\epsilon)$  as in Theorem 2, and pick a 668 discriminator  $D$  as in Fig. 2. Note that  $D$  uses a PAP-PAC learner for the class  $\mathcal{D} \cup (1 - \mathcal{D})$  whose

669 existence follows from the PAP-PAC learnability of  $\mathcal{D}$  via standard arguments (which we omit). The  
 670 next lemma summarizes the properties of  $D$  that are needed for the proof.

671 **Lemma 6.** *Let  $D$  be the discriminator defined in Fig. 2 with input parameters  $(\epsilon, \delta, \tau)$  and input  
 672 sample  $S$ , and let  $M$  be the assumed PAP-PAC learner for  $\mathcal{D} \cup (1 - \mathcal{D})$  with sample complexity  
 673  $m(\epsilon, \delta)$  and privacy parameters  $(\alpha, \beta)$ . Then,  $D$  is  $(6\tau\alpha(\tau|S|) + \tau, 4e^{6\tau\alpha(\tau|S|)}\tau\beta(\tau|S|))$ -private,  
 674 and if  $S$  satisfies*

$$|S| \geq \max\left(\frac{m(\epsilon/8, \tau\delta/2)}{\tau}, \frac{64 \log(\tau\delta/2)}{\epsilon\tau}\right) \quad (7)$$

675 then following holds with probability at least  $(1 - \tau\delta)$

- 676 (i) If  $D$  outputs  $d_t$  then  $p_S(d_t) - p_t(d_t) \geq \frac{\epsilon}{2}$ .  
 677 (ii) If  $D$  outputs “WIN” then  $\text{IPM}_{\mathcal{D}}(p_S, p_t) \leq \epsilon$ .

678 We first use Lemma 6 to conclude the proof of  $1 \Rightarrow 2$  and then prove Lemma 6.

679 The fooling algorithm we consider proceeds as follows.

- 680 • Set  $G$  to be a generator with round complexity  $T(\epsilon)$  and set its error parameter to be  $\frac{\epsilon_0}{2}$ .
- 681 • Set the number of rounds  $T_0 = \min\{|S|^{0.99}, T(\epsilon_0/4)\}$ , and let  $\tau_0 = 1/T_0$ .
- 682 • Set  $D$  be the discriminator depicted in Fig. 2 and set its parameters to be  $(\epsilon, \delta, \tau) =$   
 683  $(\frac{\epsilon_0}{2}, \frac{\delta_0}{2}, \tau_0)$  and its input sample to be  $S$ .
- 684 • Let  $G$  and  $D$  to play against each other for (at most)  $T_0$  rounds.
- 685 • Output the final distribution which is held by  $G$ .

686 We next prove the privacy and fooling properties as required by a DP algorithm:

687 **Privacy.** We argue that the algorithm is  $(\alpha', \beta')$ -private, with  $\alpha'(|S|) = O(1)$  and  $\beta'(|S|)$  negligi-  
 688 ble. Note that since  $G$  is deterministic then the output distribution  $p_{out}$  is completely determined by  
 689 the sequence of discriminating functions  $d_1, \dots, d_{T'}$  outputted by the discriminator.

690 For simplicity and without loss of generality we assume that  $T' = T_0$ : indeed, if  $T' < T_0$  then extend  
 691 it by repeating the last discriminating function; this does not change the fact that  $p_{out}$  is determined  
 692 by the sequence  $d_1, \dots, d_{T'}, \dots, d_{T_0}$ .

693 Recall that by Lemma 6  $D$  is  $((6\tau_0\alpha(\tau_0|S|) + \tau_0), (4e^{6\tau_0\alpha(\tau_0|S|)}\tau_0\beta(\tau_0|S|)))$ -private. Therefore,  
 694 since the number of rounds in which  $D$  is applied is  $T_0$ , by *composition* (Lemma 2) and *post-*  
 695 *processing* (Lemma 1) it follows that the entire algorithm is

$$\left(T_0(6\tau_0\alpha(\tau_0|S|) + \tau_0), T_0(4e^{6\tau_0\alpha(\tau_0|S|)}\tau_0\beta(\tau_0|S|))\right)\text{-private.}$$

696 Our choices of  $\tau_0 = \frac{1}{T_0}$  and  $T_0$  guarantee that  $1/\tau_0 < m^{0.99}$ , and plugging it in yields privacy guar-  
 697 antee of  $(6\alpha(|S|^{0.001}) + 1, 4e^{O(1)}\beta(|S|^{0.001}))$ . As  $\alpha(|S|^{0.001}) = O(1)$  and  $\beta(|S|^{0.001})$  is negligible,  
 698 the desired privacy guarantee follows.

699 **Fooling.** First note that if  $S$  satisfies Eq. (7) with  $(\epsilon, \delta, \tau) := (\epsilon_0, \frac{\delta_0}{2}, \tau_0)$  then with probability at  
 700 least  $1 - \frac{\delta_0}{2}$  the following holds: in every iteration  $t \leq T_0$ , either  $p_S(d_t) - p_t(d_t) \geq \frac{\epsilon_0}{4}$ , or the  
 701 discriminator yields WIN and  $\text{IPM}_{\mathcal{D}}(p_S, p_t) \leq \frac{\epsilon_0}{2}$ . This follows by a union bound via the utility  
 702 guarantee in Lemma 6. Assuming this event holds, we claim that if  $|S|$  is set to satisfy  $|S|^{0.99} \geq T(\frac{\epsilon_0}{4})$   
 703 then the output distribution  $p_{syn}$  satisfies  $\text{IPM}_{\mathcal{D}}(p_S, p_{syn}) \leq \frac{\epsilon_0}{2}$ . This follows since as long as the  
 704 sequential game proceeds the generator suffers a loss of at least  $\frac{\epsilon_0}{4}$  in every round, and the number of  
 705 rounds is set as, in this case, to be  $T(\frac{\epsilon_0}{4})$ . Therefore we require

$$|S|^{0.99} \geq T\left(\frac{\epsilon_0}{4}\right) = \Omega\left(\frac{\ell^*}{\epsilon_0^2} \log \frac{\ell^*}{\epsilon_0}\right). \quad (8)$$

706 To conclude, if  $|S|$  is set to satisfy Eqs. (6) to (8) then with probability at least  $1 - \delta_0$   
707 both  $\text{IPM}_{\mathcal{D}}(p_{\text{real}}, p_S) \leq \frac{\epsilon_0}{2}$  and  $\text{IPM}_{\mathcal{D}}(p_S, p_{\text{syn}}) \leq \frac{\epsilon_0}{2}$ , which implies that  $\text{IPM}_{\mathcal{D}}(p_{\text{real}}, p_{\text{syn}}) \leq$   
708  $\epsilon_0$  as required. This concludes the proof of  $1 \Rightarrow 2$ .

709 **Proof of Lemma 6.** Let  $S$  be the input sample, let  $p_S$  denote the uniform distribution over  $S$ , and  
710 let  $p_t$  denote the distribution submitted by the generator. The discriminator operates as follows (see  
711 Fig. 2): it feeds the assumed PAP-PAC learner a labeled sample  $S_\ell = \{(x_i, y_i)\}$  that is drawn from  
712 the following distribution  $q_t$ : first the label  $y_i$  is drawn uniformly from  $\{0, 1\}$ ; if  $y_i = 0$  then draw  
713  $x_i \sim p_S$  and if  $y_i = 1$  then draw  $x_i \sim p_t$ . Let  $d_t$  denote the output of the PAP-PAC learner on the  
714 input sample  $S$ . Observe that the loss  $L_{q_t}(\cdot)$  satisfies

$$L_{q_t}(d) = \frac{p_S(d) + (1 - p_t(d))}{2} = \frac{1 + p_S(d) - p_t(d)}{2}. \quad (9)$$

715 Next, the discriminator checks whether  $p_S(d_t) - p_t(d_t) > \frac{\epsilon}{2}$  (equivalently, if  $L_{q_t}(d_t) < \frac{1-\epsilon/2}{2}$ ),  
716 and sends  $d_t$  the generator if so, and reply with “WIN” otherwise. The issue is that checking this  
717 “If” condition naively may violate privacy, and in order to avoid it we add noise to this check by a  
718 mechanism from [14] (see Fig. 3): roughly, this mechanism receives a data set of scalars  $\Sigma = \{\sigma_i\}_{i=1}^m$ ,  
719 a threshold parameter  $c$  and a margin parameters  $N$ , and outputs  $\top$  if  $\sum_{i=1}^m \sigma_i > c + O(1/N)$  or  
720  $\perp$  if  $\sum_{i=1}^m \sigma_i < c - O(1/N)$ . The distinguisher applies this mechanism over the sequence of  
721 scalars  $\{d_t(x_1), \dots, d_t(x_m)\}$ .

722 We next formally establish the privacy and utility guarantees of  $D$ . In what follows, assume that the  
723 input sample  $S$  satisfies Eq. (7),

724 **Privacy.** The discriminator  $D$  is a composition of two procedures,  $M_1$  and  $M_2$ , where  $M_1$  applies  
725 the PAP-PAC learner  $M$  on the random subsample  $S_\ell$ , and  $M_2$  runs the procedure THRESH. Thus,  
726 the privacy guarantee will follow from the composition lemma (Lemma 2) if we show that  $M_1$   
727 is  $(6\tau\alpha(\tau m), 4e^{6\tau\alpha(\tau m)}\tau\beta(\tau m))$ -private and  $M_2$  is  $(\tau, 0)$ -private. The privacy guarantee of  $M_1$   
728 follows by applying<sup>6</sup> Lemma 3 with  $v := |S|$  and  $n := |S_\ell| = \tau|S|$ , and the privacy guarantee of  $M_2$   
729 follows from the statement in Fig. 3 since  $\frac{N}{|\Sigma|} = \frac{|S_\ell|}{|S|} = \tau$ .

730 **Utility.** Let  $q_t$  denote the distribution from which the subsample  $S_\ell$  is drawn. Note that by Eq. (7),  
731  $S_\ell = \tau \cdot |S| \geq m(\epsilon/8, \tau\delta/2)$ . Therefore, since  $M$  PAC learns  $\mathcal{D}$ , its output  $d_t$  satisfies:

$$L_{q_t}(d_t) \leq \min_{d \in \mathcal{D} \cup (1-\mathcal{D})} L_{q_t}(d) + \frac{\epsilon}{8},$$

732 with probability at least  $1 - \tau\delta/2$ . By Eq. (9) this is equivalent to

$$p_S(d_t) - p_t(d_t) \geq \max_{d \in \mathcal{D} \cup (1-\mathcal{D})} (p_S(d) - p_t(d)) - \epsilon/4. \quad (10)$$

733 Now, by plugging in the statement in Fig. 3:  $(\Sigma, c, N) := (\{d_t(x)\}_{x \in S}, p_t(d_t) + \frac{5\epsilon}{8}, |S_\ell|)$ ,  
734 and  $\gamma := \tau\delta/2$  and conditioning on the event that both  $M$  and THRESH succeed (which occurs  
735 with probability at least  $1 - \tau\delta$ ) it follows that

736 (i) If  $D$  outputs  $d_t$  then

$$p_S(d_t) \geq c - \frac{8 \log(1/\gamma)}{N} = p_t(d_t) + \frac{5\epsilon}{8} - \frac{8 \log(\tau\delta/2)}{\tau|S|} \geq p_t(d_t) + \frac{\epsilon}{2},$$

737 where in the last inequality we used that  $|S| \geq \frac{64 \log(\tau\delta/2)}{\epsilon\tau}$  (by Eq. (7)).

738 (ii) If  $D$  outputs WIN then by a similar calculation  $p_S(d_t) \leq p_t(d_t) + \frac{3\epsilon}{4}$  and therefore

$$\text{IPM}_{\mathcal{D}}(p_S, p_t) = \max_{d \in \mathcal{D} \cup (1-\mathcal{D})} (p_S(d) - p_t(d)) \leq p_S(d_t) - p_t(d_t) + \frac{\epsilon}{4} \leq \epsilon,$$

739 where in the first inequality we used Eq. (10).

740 This concludes the proof of Lemma 6.

741

□

<sup>6</sup>Note that in order to apply Lemma 3 on  $M_1$ , we need to assume that  $M$  satisfies  $(\alpha, \beta)$  privacy with  $\alpha \leq 1$ . This assumption does not lose generality – see the paragraph following the definition of Private PAC Learning.

- Let  $M$  be a PAP-PAC learner for the class  $\mathcal{D} \cup (1 - \mathcal{D})$  with sample complexity  $m(\epsilon, \delta)$ .
- Let  $\epsilon, \delta, \tau$  be the input parameters.
- Let  $S$  be the input sample, let  $p_S$  be the uniform distribution over  $S$ , and let  $p_t$  be the distribution submitted by the generator.
- Draw a labelled sample  $S_\ell = \{(x_i, y_i)\}$  of size  $\tau \cdot |S|$  independently as follows: draw the label  $y_i$  uniformly from  $\{0, 1\}$ 
  - (i) if  $y_i = 0$  then draw  $x_i \sim p_S$ ,
  - (ii) if  $y_i = 1$  then draw  $x_i \sim p_t$ .
- Apply the learner  $M$  on the sample  $S_\ell$  and set  $d_t \in \mathcal{D}$  as its output.
- Compute  $Z := \text{THRESH}(\{d_t(x)\}_{x \in S}, p_t(d_t) + \frac{5\epsilon}{8}, |S_\ell|)$ .
  - (i) If  $Z = \top$  then send the generator with  $d_t$ ,
  - (ii) else,  $Z = \perp$  and reply the generator with “Win”.

Figure 2: Depiction of the private discriminator used in Theorem 1. The discriminator holds the target distribution  $p_S$ , where  $S$  is a sufficiently large sample from  $p_{real}$ . In each round the discriminator decides whether  $p_S$  is indistinguishable from the distribution submitted by the generator and replies accordingly.

- THRESH.** The procedure THRESH receives as input a dataset of scalars  $\Sigma = \{\sigma_i\}$ , a threshold parameter  $c > 0$  and a margin parameter  $N$  and has the following properties (see Theorem 3.23 in [14] for proof of existence):
- THRESH( $\Sigma, c, N$ ) is  $(N/|\Sigma|, 0)$ -private.
  - For every  $\gamma > 0$ :
    - If  $\frac{1}{|\Sigma|} \sum_{\sigma \in \Sigma} \sigma > c + \frac{8 \log 1/\gamma}{N}$  then THRESH outputs  $\top$  with probability at least  $1 - \gamma$
    - If  $\frac{1}{|\Sigma|} \sum_{\sigma \in \Sigma} \sigma < c - \frac{8 \log 1/\gamma}{N}$  then THRESH outputs  $\perp$  with probability at least  $1 - \gamma$

Figure 3: The procedure: THRESH

742 **2 $\Rightarrow$ 3.** This follows directly from the definition of a DP-Fooling algorithm. Indeed, given a DP-  
743 Fooling algorithm with sample complexity  $m(\epsilon, \delta)$  and a sample  $S$  outputs a distribution  $p_{syn}$   
744 such that  $\text{IPM}_{\mathcal{D}}(p_{syn}, p_S) \leq \epsilon$ , with probability at least  $(1 - \delta)$  and satisfies  $(\alpha, \beta)$ -privacy, with  
745  $\alpha = O(1)$  and  $\beta$  negligible. To obtain a sanitizer, output the estimate  $\text{EST} : \mathcal{D} \rightarrow [0, 1]$ , where  
746  $\text{Est}(d) = \mathbb{E}_{x \sim p_{syn}} [d(x)]$ .

747 **3 $\Rightarrow$ 1.** This follows from Theorem 5.5 in [5].

748 **4 $\Rightarrow$ 1.** This is an immediate corollary of post-processing for differential privacy (Lemma 1). Indeed,  
749 by the private uniform convergence property we can privately estimate the losses of all hypotheses in  
750  $\mathcal{D}$ , and then output any hypothesis in  $\mathcal{D}$  that minimizes the estimated loss.

751 **1 $\Rightarrow$ 4.** Suppose  $\mathcal{D}$  is PAP-PAC learnable by an algorithm  $A$ . For every function  $d \in \mathcal{D}$ , let  $d'$  denote  
752 the  $(X \times \{0, 1\}) \rightarrow \{0, 1\}$  function defined by  $d'((x, y)) = \mathbf{1}[d(x) \neq y]$ , and let  $\mathcal{D}' = \{d' : d \in \mathcal{D}\}$ .  
753 Observe that for every sample  $S \subseteq (X \times \{0, 1\})^m$ :

$$L_S(d) = p_S(d'), \quad (11)$$

754 where  $L_S(d)$  denotes the empirical loss of  $d$  and  $p_S$  denotes the empirical measure of  $d'$ .

755 We claim that  $\mathcal{D}'$  is also PAP-PAC learnable: for a  $\mathcal{D}'$ -example  $z' = ((x, y), y')$  let  $z$  denote the  
756  $\mathcal{D}$ -example  $(x, |y' - y|)$ , and note that  $d'$  errs on  $z'$  if and only if  $d$  errs on  $z$ . Therefore, a PAP-PAC

757 learner for  $\mathcal{D}'$  follows by using this transformation to convert the  $\mathcal{D}'$ -input sample  $S' = \{z'_i\}_{i=1}^m$  to a  
 758  $\mathcal{D}$  input sample  $S = \{z_i\}_{i=1}^m$ , applying  $A$  on  $S$  and outputting  $d'$ , where  $d = A(S)$ .

759 Therefore, by  $1 \implies 3$  it follows that  $\mathcal{D}'$  is sanitizable by a sanitizer  $M$  with sample complex-  
 760 ity  $m_1(\epsilon, \delta)$ . We next use  $M$  to show that  $\mathcal{D}$  satisfies private uniform convergence: let  $\mathbb{P}$  be a  
 761 distribution over  $\mathcal{X} \times \{0, 1\}$  and  $\epsilon, \delta$  be the error and confidence parameters. Consider the following  
 762 algorithm:

- 763 • Draw a sample  $S$  from  $\mathbb{P}$  of size  $m(\epsilon, \delta) = \max\{m_1(\frac{\epsilon}{2}, \frac{\delta}{2}), m_2(\frac{\epsilon}{2}, \frac{\delta}{2})\}$ , where

$$m_2 = O\left(\frac{\text{VC}(\mathcal{D}) + \log(1/\delta)}{\epsilon^2}\right)$$

764 is the uniform convergence rate of  $\mathcal{D}$  (note that by PAC learnability,  $\text{VC}(\mathcal{D}) < \infty$ ).

- 765 • Apply  $M$  on  $S$  to obtain an estimator  $\text{EST}' : \mathcal{D}' \rightarrow [0, 1]$  and output the estimator  
 766  $\text{EST} : \mathcal{D} \rightarrow [0, 1]$  defined by  $\text{EST}(d) = \text{EST}'(d')$ .

767 We want to show that

$$(\forall d \in \mathcal{D}) : |\text{EST}(d) - L_{\mathbb{P}}(d)| \leq \epsilon,$$

768 with probability  $1 - \delta$ . Indeed, since  $m \geq m_2(\frac{\epsilon}{2}, \frac{\delta}{2})$  it follows that

$$(\forall d \in \mathcal{D}) : |L_S(d) - L_{\mathbb{P}}(d)| \leq \frac{\epsilon}{2},$$

769 with probability at least  $1 - \frac{\delta}{2}$ , and since  $m \geq m_1(\frac{\epsilon}{2}, \frac{\delta}{2})$ ,

$$\begin{aligned} (\forall d \in \mathcal{D}) : |\text{EST}(d) - L_S(d)| &= |\text{EST}'(d') - p_S(d')| && \text{(by Eq. (11))} \\ &\leq \epsilon/2, \end{aligned}$$

770 with probability  $1 - \frac{\delta}{2}$ . The desired bound thus follows by a union bound and the triangle inequality.

771 □

## 772 C Proof of Corollary 4

773 We begin by defining the predictors  $\hat{f}_t$ 's that  $L$  uses: let  $L_0$  be the learner implied by Theorem 3.  
 774 We first turn  $L_0$  into a deterministic learner whose input is  $(p_1, y_1), \dots, (p_T, y_T) \in \Delta(\mathcal{W}) \times \{0, 1\}$   
 775 and that outputs at each iteration  $f_t : \mathcal{W} \rightarrow [0, 1]$ . Then, we extend  $f_t$  linearly to  $\hat{f}_t$  as discussed in  
 776 Appendix A.1.1. Let  $(p_1, y_1), \dots, (p_T, y_T) \in \Delta(\mathcal{W}) \times \{0, 1\}$ , given  $w \in \mathcal{W}$ , the value  $f_t(w)$  is the  
 777 expected output of the following random process:

- 778 • sample  $w_i \sim p_i$  for  $i \leq t - 1$ ,
- 779 • apply  $L_0$  on the sequence  $(w_1, y_1), \dots, (w_{t-1}, y_{t-1})$  to obtain the predictor  $\tilde{f}_t$ , and
- 780 • output  $\tilde{f}_t(x)$ .

781 That is,

$$f_t(x) = \mathbb{E}_{w_{1:t-1}} \left[ \mathbb{E}_{\tilde{f}_t \sim L_0} [\tilde{f}_t(w) \mid x_1 \dots x_{t-1}] \right],$$

782 where  $\mathbb{E}_{p_{1:t}}[\cdot]$  denotes the expectation over sampling each  $w_i$  from  $p_i$  independently, and  $\mathbb{E}_{\tilde{f}_t \sim L_0}[\cdot]$   
 783 denotes the expectation over the internal randomness of the algorithm  $L_0$  at iteration  $t$ . Fi-  
 784 nally,  $\hat{f}_t(p) = \mathbb{E}_{w \sim p}[f_t(w)]$  is the predictor that  $L$  uses at the  $t$ th round. Note that indeed  $\hat{f}_t$   
 785 is determined (deterministically) from  $(p_1, y_1), \dots, (p_{t-1}, y_{t-1})$ .

786 We next bound the regret: for every  $h \in \mathcal{H}$ :

$$\begin{aligned}
\sum_{t=1}^T |\hat{f}_t(p_t) - y_t| - |\hat{h}(p_t) - y_t| &= \sum_{t:y_t=0} \hat{f}_t(p_t) - \hat{h}(p_t) + \sum_{t:y_t=1} \hat{h}(p_t) - \hat{f}_t(p_t) \\
&= \sum_{\{t:y_t=0\}} \mathbb{E}_{p_{1:t-1}} \left[ \mathbb{E}_{L_0, p_t} [\mathbb{E}[f_t(w_t)] \mid \{w_i\}_{i=1}^{t-1}] - \mathbb{E}_{p_{1:T}} [h(x_t)] \right] \\
&\quad + \sum_{\{t:y_t=1\}} \mathbb{E}_{p_{1:T}} [h(w_t)] - \mathbb{E}_{p_{1:t-1}} \left[ \mathbb{E}_{L_0, p_t} [\mathbb{E}[f_t(w_t)] \mid \{x_i\}_{i=1}^{t-1}] \right] \\
&= \sum_{\{t:y_t=0\}} \mathbb{E}_{p_{1:T}} \left[ \mathbb{E}_{L_0} [\mathbb{E}[f_t(x_t)] \mid \{w_i\}_{i=1}^T] - \mathbb{E}_{p_{1:T}} [h(w_t)] \right] \\
&\quad + \sum_{\{t:y_t=1\}} \mathbb{E}_{p_{1:T}} [h(w_t)] - \mathbb{E}_{p_{1:T}} \left[ \mathbb{E}_{L_0} [\mathbb{E}[f_t(w_t)] \mid \{w_i\}_{i=1}^T] \right] \\
&= \mathbb{E}_{p_{1:T}} \left[ \mathbb{E}_{L_0} \left[ \sum_{y_t=0} f_t(w_t) - h(x_t) + \sum_{y_t=1} h(w_t) - f_t(w_t) \mid \{w_i\}_{i=1}^T \right] \right] \\
&= \mathbb{E}_{p_{1:T}} \left[ \mathbb{E}_{L_0} \left[ \sum_{t=1}^T |f_t(w_t) - y_t| - |h(w_t) - y_t| \mid \{w_i\}_{i=1}^T \right] \right] \\
&\leq \mathbb{E}_{p_{1:T}} [\text{REGRET}_T(L_0, \{w_t, y_t\}_{t=1}^T)] \\
&\leq \sqrt{\frac{1}{2} \ell T \log T}.
\end{aligned}$$

## 787 D Extending Theorem 2, Item 1 to infinite classes

788 Here we extend the proof of the upper bound in Theorem 2 to the general case where either  $\mathcal{X}$  or  $\mathcal{D}$   
789 may be infinite. The proof follows roughly the same lines like the finite case. The first technical  
790 milestone we need to consider is to properly define a  $\sigma$ -algebra over the domain  $\mathcal{D}$  and specify the  
791 space  $\Delta(\mathcal{D})$  of probability measures. For this, we consider  $\{0, 1\}^{\mathcal{X}}$  as a topological space with an  
792 appropriately defined topology and  $\Delta(\mathcal{D})$  as the space of Borel-probability measures. We refer the  
793 reader to Appendix D.1 for the exact details.

794 We will also make some technical modifications in the protocol depicted in Fig. 1. The modification  
is depicted in Fig. 4. The first modification we make is that in the **Else** step, the generator chooses  $\bar{d}_t$

Consider Fig. 1 with the following modification, at the **Else** Step:

- Find  $\bar{d}_t \in \Delta(\mathcal{D})$ , **with finite support** such that

$$(\forall x \in \mathcal{X}) : \mathbb{E}_{d \sim \bar{d}_t} [f_t(d) - x(d)] > \frac{\epsilon}{4}$$

(if no such  $\bar{d}_t$  exists then output “error”).

Figure 4: Modifying Fig. 1

795 with finite support. For the finite case, the requirement that  $\bar{d}_t$  has finite support is met automatically.  
796 The second modification we make allows further slack in the distinguisher. Instead of requiring  $> \frac{\epsilon}{2}$   
797 we allow  $> \frac{\epsilon}{4}$ . Clearly this change in constant does not change the asymptotic regret bound.  
798

799 **Proof outline.** To extend the proof to the infinite case it suffices to ensure that the generator in  
800 Fig. 1 (with the modification in Fig. 4) never outputs “error” in the 2nd item of the “For” loop.  
801 To be precise, let us add the following notation that is consistent with the algorithm in Fig. 1. Let  
802  $f : \mathcal{D} \rightarrow [0, 1]$  be measurable.

803 1. If there exists  $p \in \Delta(\mathcal{X})$  such that

$$(\forall d \in \mathcal{D}) : \mathbb{E}_{x \sim p} [f(d) - x(d)] \leq \frac{\epsilon}{2},$$

804 we say that  $f$  satisfies Item 1.

805 2. If there exists  $\bar{d} \in \Delta(\mathcal{D})$  such that

$$(\forall x \in \mathcal{X}) : \mathbb{E}_{d \sim \bar{d}} [f(d) - x(d)] > \frac{\epsilon}{2}$$

806 we say that  $f$  satisfies Item 2.

807 3.  $f$  is *amenable* if it satisfies either Item 1 or Item 2.

808 When  $\mathcal{X}$  and  $\mathcal{D}$  are finite, every  $f$  satisfies one of Items 1 or 2 (and hence amenable). This is the  
 809 content of Lemma 5 which is proved using strong duality (in the form of the Minmax Theorem).  
 810 However, the case when  $\mathcal{X}$  and  $\mathcal{D}$  are infinite is more subtle. Specifically, the Minmax Theorem does  
 811 not necessarily hold in this generality.

812 The next lemma guarantees the existence of a learner  $\mathcal{A}$  which only outputs amenable functions.  
 813 Recall that  $\hat{f} : \Delta(\mathcal{D}) \rightarrow [0, 1]$  denotes the linear extension of  $f$  and is defined by  $\hat{f}(\bar{d}) = \mathbb{E}_{d \sim \bar{d}} [f(d)]$ .

814 **Lemma 7.** *Let  $\mathcal{D}$  be a discriminating class with dual Littlestone dimension  $\ell^*$ , and let  $T$  be the*  
 815 *horizon. Then, there exists a deterministic online learning algorithm  $\mathcal{A}$  for the dual class  $\mathcal{X}$*   
 816 *that receives labelled examples from the domain  $\Delta(\mathcal{D})$  and uses predictors of the form  $\hat{f}_t$  for*  
 817 *some  $f_t : \mathcal{D} \rightarrow [0, 1]$ , such that:*

818 1.  $\mathcal{A}$ 's regret is  $O(\sqrt{\ell^* T \log T})$ , and

819 2. For all  $t \leq T$ , if the sequence of observed examples  $(\bar{d}_1, y_1), \dots, (\bar{d}_{t-1}, y_{t-1})$  up to iteration  
 820  $t$ , all have finite support then  $\mathcal{A}$  chooses  $f_t$  that is amenable (in particular  $f_1$  is also  
 821 amenable).

822 Our next Lemma shows that Fig. 1 with the modification depicted in Fig. 4 will indeed never output  
 823 error:

824 **Lemma 8.** *Consider Fig. 1 with the modification depicted in Fig. 4. Assume  $\mathcal{A}$  satisfies the properties*  
 825 *in Lemma 7. Then for all  $t \leq T$  the generator never outputs error.*

826 *Proof.* The proof follows by induction, for  $t = 1$  the amenability of  $f_1$  ensures that if  $f_1$  doesn't  
 827 satisfy Item 1 then there exists  $\bar{d} \in \Delta(\mathcal{D})$  that satisfy Item 2. Now recall that  $\mathcal{X}$  has finite Littlestone  
 828 dimension and in particular finite VC dimension, by uniform convergence it follow that there is a  
 829 finite sample  $d_1, \dots, d_m$  such that

$$\sup_{x \in \mathcal{X}} \left| \mathbb{E}_{d \sim \bar{d}} [f_1(d) - x(d)] - \frac{1}{m} \sum_{i=1}^m f_1(d_i) - x(d_i) \right| \leq \frac{\epsilon}{4}$$

830 We then choose  $\bar{d}_1$  to be a uniform distribution over  $d_1, \dots, d_m$ . By the condition in Item 2 and the  
 831 above equation we obtain that

$$\mathbb{E}_{d \sim \bar{d}_1} [f(d) - x(d)] > \frac{\epsilon}{4}$$

832 We continue with the induction step, and consider  $t = t_0$ . Note that by construction at each iteration  
 833 up to iteration  $t_0$  the algorithm  $\mathcal{A}$  observed only distributions with finite support. In particular, we  
 834 have that  $f_{t_0}$  will be amenable. Hence, if it doesn't satisfy Item 1 then we again obtain  $\bar{d}$  that satisfies  
 835 Item 2. We next discretize  $\bar{d}$  as before. Using the finite VC dimension of  $\mathcal{X}$  we obtain  $\bar{d}_{t_0}$  that has  
 836 finite support and satisfies:

$$\mathbb{E}_{d \sim \bar{d}_{t_0}} [f(d) - x(d)] > \frac{\epsilon}{4}$$

837

□

838 Lemma 7, together with Lemma 8, implies the upper bound in Theorem 2, Item 1 via the same  
839 argument as in the finite case. This follows by picking the online learner used by the generator in  
840 Fig. 1 as in Lemma 7; the amenability of the  $f_t$ 's (and Lemma 8) implies that the protocol never  
841 outputs “error”, and the rest of the argument is exactly the same like in the finite case (with slight  
842 deterioration in the constants).

843 **Corollary 5.** *Let  $A$  be an algorithm like in the above Lemma. Then, if one uses  $A$  as the online  
844 learner in the algorithm in Fig. 1, together with the modification in Fig. 4, then the round complexity  
845 of it is at most  $O(\frac{\ell^*}{\epsilon^2} \log \frac{\ell^*}{\epsilon})$ , as in Theorem 2, Item 1.*

846 In the remainder of this section we prove Lemma 7.

## 847 D.1 Preliminaries

848 We first present standard notions and facts from topology and functional analysis that will be used.  
849 We refer the reader to [35, 34] for further reading.

850 **Weak\* topology.** Given a compact Hausdorff space  $K$ , let  $\Delta(K)$  denote the space of Borel  
851 measures over  $K$ , and let  $C(K)$  denote the space of continuous real functions over  $K$ . The weak\*  
852 topology over  $\Delta(K)$  is defined as the weakest<sup>7</sup> topology so that for any continuous function  $f \in$   
853  $C(K)$  the following “ $\Delta(K) \rightarrow \mathbb{R}$ ” mapping is continuous

$$T_f(\mu) = \int f(k) d\mu(k).$$

854 We will rely on the following fact, which is a corollary of Banach–Alaglou Theorem (see e.g. Theorem  
855 3.15 in [34]) and the duality between  $C(K)$  and  $\mathcal{B}(K)$ , the class of Borel measures over  $K$ :

856 **Claim 2.** *Let  $K$  be a compact Hausdorff space. Then  $\Delta(K)$  is compact in the weak\* topology.*

857 **Upper and lower semicontinuity.** Recall that a real function  $f$  is called upper semicontinuous  
858 (u.s.c) if for every  $\alpha \in \mathbb{R}$  the set  $\{x : f(x) \geq \alpha\}$  is closed. Note that  $\limsup_{x \rightarrow x_0} f(x) \leq f(x_0)$  for  
859 any  $x_0$  in the domain of  $f$ . Similarly,  $f$  is called lower semicontinuous (l.s.c) if  $-f$  is u.s.c. We will  
860 use the following fact:

861 **Claim 3.** *Let  $K$  be a compact Hausdorff space and assume  $E \subseteq K$  is a closed set. Consider the  
862 “ $\Delta(K) \rightarrow [0, 1]$ ” mapping  $T_E(\mu) = \mu(E)$ . Then  $T_E$  is u.s.c with respect to the weak\* topology on  
863  $\Delta(K)$ .*

864 *Proof.* This fact can be seen as a corollary of Urysohn’s Lemma (Lemma 2.12 in [35]). Indeed, Borel  
865 measures are *regular* (see definition 2.15 in [35]). Thus, for every closed set  $E$  we have

$$\mu(E) = \inf_{\{U: E \subseteq U, U \text{ is open}\}} \mu(U).$$

866 Fix a closed set  $E$ . Urysohn’s Lemma implies that for every open set  $U \supseteq E$ , there exists a continuous  
867 function  $f_U \in C(K)$  such that  $\chi_E \leq f_U \leq \chi_U$ , where  $\chi_A$  is the indicator function over the set  $A$   
868 (i.e.  $\chi_A(x) = 1$  if and only if  $x \in A$ ).

869 Thus, we can write  $\mu(E) = \inf_{\{U: E \subseteq U, U \text{ is open}\}} \mu(f_U)$ , where  $\mu(f_U) = \mathbb{E}_{x \sim \mu}[f_U]$ . Now, by  
870 continuity of  $f_U$ , it follows that the mapping  $\mu \mapsto \mu(f_U)$  is continuous with respect to the weak\*  
871 topology on  $\Delta(K)$ . Finally, the claim follows since the infimum of continuous functions is u.s.c.  $\square$

872 **Sion’s Theorem.** We next state the following generalization of Von-Neumann’s Theorem for  
873 u.s.c/l.s.c payoff functions.

874 **Theorem 4 (Sion’s Theorem).** *Let  $W$  be a compact convex subset of a linear topological space  
875 and  $U$  a convex subset of a linear topological space. If  $F$  is a real valued function on  $W \times U$  with*

- 876 •  $F(w, \cdot)$  is l.s.c and convex on  $U$  and
- 877 •  $F(\cdot, u)$  is u.s.c and concave on  $W$

878 then,

$$\max_{w \in W} \inf_{u \in U} F(w, u) = \inf_{u \in U} \max_{w \in W} F(w, u)$$

<sup>7</sup>In the sense that every other topology with this property contains all open sets in the weak\* topology.



879 **Tychonof's space.** The last notion we introduce is the topology we will use on  $\{0, 1\}^{\mathcal{X}}$ . Given an  
880 arbitrary set  $\mathcal{X}$ , the space  $\mathcal{F} = \{0, 1\}^{\mathcal{X}}$  is the space of all functions  $f : X \rightarrow \{0, 1\}$ . The product  
881 topology on  $\mathcal{F}$  is the weakest topology such that for every  $x \in \mathcal{X}$  the mapping  $\Pi_x : \mathcal{F} \rightarrow \{0, 1\}$ ,  
882 defined by  $\Pi_x(f) = f(x)$  is continuous.

883 A basis of open sets in the product topology is provided by the sets  $U_{x_1, \dots, x_m}(g)$  of the form:

$$U_{x_1, \dots, x_m}(g) = \{f : g(x_i) = f(x_i) \ i = 1, \dots, m\},$$

884 where  $x_1, \dots, x_m$  are arbitrary elements in  $X$  and  $g \in \mathcal{F}$ .

885 A remarkable fact about the product topology is that the space  $\mathcal{F}$  is compact for any domain  $\mathcal{X}$  (see  
886 for example [27]). We summarize the above discussion in the following claim

887 **Claim 4.** *Let  $\mathcal{X}$  be an arbitrary set and consider  $\mathcal{F} = \{0, 1\}^{\mathcal{X}}$  equipped with the product topology.  
888 Then  $\mathcal{F}$  is compact and  $\Pi_x \in C(\mathcal{F})$  for every  $x \in X$ , where  $\Pi_x$  is defined as  $\Pi_x(f) = f(x)$ .*

## 889 D.2 Two Technical Lemmas

890 The proof of Lemma 7 follows from the following two Lemmas. Throughout the proofs we will treat  
891  $\mathcal{D}$  as a topological subspace in  $\{0, 1\}^{\mathcal{X}}$  with the product topology. We will also naturally treat  $\Delta(\mathcal{D})$   
892 as a topological space equipped with the weak\* topology.

893 **Lemma 9** (Analog of Lemma 5). *Assume  $\mathcal{D} \subseteq \{0, 1\}^{\mathcal{X}}$  is closed and let  $f : \mathcal{D} \rightarrow [0, 1]$ . Assume  
894 that  $\hat{f}$  is u.s.c (with respect to the weak\* topology on  $\Delta(\mathcal{D})$ ) then  $f$  is amenable.*

895 **Lemma 10** (Analog of Corollary 4). *Let  $\mathcal{D} \subseteq \{0, 1\}^{\mathcal{X}}$  be closed and let  $\ell^*$  denote its dual Littlestone  
896 dimension. Then, there exists a deterministic online learner that receives labelled examples from the  
897 domain  $\Delta(\mathcal{D})$  such that for every sequence  $(p_t, y_t)_{t=1}^T$  we have that:*

$$\text{REGRET}_T(L) \leq \sqrt{\frac{1}{2} \ell^* T \log T}$$

898 *Moreover, at each iteration  $t$  the predictor,  $\hat{f}_t$ , used by  $L$  is of the form  $\hat{f}_t[\bar{d}] = \mathbb{E}_{d \sim \bar{d}}(f_t(d))$   
899 for some  $f_t : \mathcal{D} \rightarrow [0, 1]$ . Finally, for every  $t \leq T$ , if the sequence of observed examples  
900  $(\bar{d}_1, y_1), \dots, (\bar{d}_{t-1}, y_{t-1})$  all have finite support then  $\hat{f}_t$  is u.s.c.*

901 We first show how to conclude the proof of Lemma 7 using these lemmas and later prove the two  
902 lemmas.

903 **Concluding the proof of Lemma 7.** The proof follows directly from the two preceding Lemmas.  
904 Given a discriminating class  $\mathcal{D} \subseteq \{0, 1\}^{\mathcal{X}}$  there is no loss of generality in assuming  $\mathcal{D}$  is closed,  
905 since closing the class with respect to the product topology does not increase its dual Littlestone  
906 dimension.

907 Now, take the learner  $\mathcal{A}$  whose existence follows from Lemma 10. Since each  $\hat{f}_t$  is u.s.c we obtain  
908 via Lemma 9 that each  $f_t$  is also amenable.

909 **Proof of Lemma 9.** Lemma 9 extends Lemma 5 to the infinite case. Similar to the proof of  
910 Lemma 5 which hinges on Von-Neumann's Minmax Theorem, the proof here hinges on Sion's  
911 Theorem which is valid in this setting.

912 Before proceeding with the proof we add the following notation: let  $\mathbb{R}_{fin}^{\mathcal{X}}$  denote the space of real-  
913 valued functions  $v : \mathcal{X} \rightarrow \mathbb{R}$  with finite support, i.e.  $v(x) = 0$  except for maybe a finite many  $x \in \mathcal{X}$ .  
914 We equip  $\mathbb{R}_{fin}^{\mathcal{X}}$  with the topology induced by the  $\ell_1$  norm, namely a basis of open sets is given by the  
915 open balls  $\bar{U}_{v, \epsilon} = \{u : \sum_{x \in \mathcal{X}} |v(x) - u(x)| < \epsilon\}$ .  $\mathbb{R}_{fin}(\mathcal{X})$  is indeed a linear topological space (i.e.  
916 the vector addition and scalar multiplication mappings are continuous). Finally, define

$$\Delta_{fin}(\mathcal{X}) := \{p \in \mathbb{R}_{fin}^{\mathcal{X}} : p(x) \geq 0 \ \sum_{x \in \mathcal{X}} p(x) = 1\}.$$

917 Next, let  $f : \mathcal{D} \rightarrow [0, 1]$  be such that  $\hat{f}$  is u.s.c. Our goal is to show that  $f$  is amenable. Set  $F$  to be  
918 the following real-valued function over  $\Delta(\mathcal{D}) \times \Delta_{fin}(\mathcal{X})$ :

$$F(\bar{d}, p) = \mathbb{E}_{\bar{d} \sim \bar{d}} \left[ f(d) - \sum_{x \in \mathcal{X}} p(x)x(d) \right]$$

919 It suffices to show that

$$\max_{\bar{d} \in \Delta(\mathcal{D})} \inf_{p \in \Delta_{fin}(\mathcal{X})} F(\bar{d}, x) = \inf_{p \in \Delta_{fin}(\mathcal{X})} \max_{\bar{d} \in \Delta(\mathcal{D})} F(\bar{d}, p) \quad (12)$$

920 Indeed, the assumption that Item 1 does not hold implies in particular that

$$\inf_{p \in \Delta_{fin}(\mathcal{X})} \max_{d \in \Delta(\mathcal{D})} F(\bar{d}, p) \geq \frac{\epsilon}{2}.$$

921 Eq. (12) then states that

$$\max_{\bar{d} \in \Delta(\mathcal{D})} \inf_{x \in \mathcal{X}} \mathbb{E}_{d \sim \bar{d}} [f(d) - x(d)] \geq \frac{\epsilon}{2}.$$

922 which proves that Item 2 holds.

923 Eq. (12) follows by an application of Theorem 4 on the function  $F$ . Thus, we next show the  
 924 premise of Theorem 4 is satisfied by  $F$ . Indeed,  $W = \Delta(\mathcal{D})$  is compact and convex, and  $U =$   
 925  $\Delta_{fin}(\mathcal{X})$  is convex. We show that  $F(\cdot, p)$  is concave and u.s.c for every fixed  $p \in \Delta_{fin}(\mathcal{X})$ : indeed,  
 926  $F(\cdot, p)$  is in fact linear and therefore concave. We show that  $F(\cdot, p)$  is u.s.c by showing that it  
 927 is the sum of (i) a u.s.c function (i.e.  $\mathbb{E}_{d \sim \bar{d}}[f(d)]$ ) and (ii) finitely many continuous functions (i.e.  
 928  $\sum_{x \in \mathcal{X}} p(x) \mathbb{E}_{d \sim \bar{d}}[x(d)]$ ). Indeed, (i) by assumption  $\hat{f}(\bar{d}) = \mathbb{E}_{d \sim \bar{d}}[f(d)]$  is u.s.c, and (ii) by Claim 4,  
 929 the mapping  $\Pi_x(d)$  is continuous for every  $x \in \mathcal{X}$  which, by the definition of the weak\* topology,  
 930 implies that  $\bar{d} \rightarrow \mathbb{E}_{d \sim \bar{d}} \Pi_x(d) = \mathbb{E}_{d \sim \bar{d}} [x(d)]$  is continuous.

931 Finally, because  $\mathbb{E}_{d \sim \bar{d}}[x(d)] \leq 1$  is bounded, it follows that  $F(\bar{d}, \cdot)$  is linear and continuous in  $p$  for  
 932 every fixed  $\bar{d}$ : indeed treating  $\hat{f}(\bar{d})$  and  $\{\mathbb{E}_{d \sim \bar{d}} [x(d)]\}_{x \in \mathcal{X}}$  as bounded constants, we have that:

$$F(\bar{d}, p) = \hat{f}(\bar{d}) - \sum_{x \in \mathcal{X}} p(x) \mathbb{E}_{d \sim \bar{d}} [x(d)]$$

933 **Proof of Lemma 10.** Lemma 10 follows from a close examination of the proof provided in [6] for  
 934 Theorem 3 and the extension to Corollary 4.

935 The fact that the learner outputs a predictor of the form  $\hat{f}_t = \mathbb{E}_{d \sim d} [f_t(d)]$  follows by construction  
 936 in Corollary 4. So, it suffices to show that the  $f_t$ 's can be chosen to be u.s.c. Call a function  
 937  $s : \mathcal{D} \rightarrow \{0, 1\}$  an SOA-type function if there exists a hypothesis class  $\mathcal{H} \subseteq \mathcal{X}$  such that

$$s(d) = \begin{cases} 0 & \text{Ldim}(\mathcal{H}|_{(d,0)}) = \text{Ldim}(H) \\ 1 & \text{else} \end{cases}$$

938 where  $H|_{(d,0)} = \{h \in H\} : h(d) = 0\}$ .

939 In the proof by [6] of Theorem 3 the authors construct an online learner which at each iteration  
 940 uses a randomized predictor (i.e. a distribution over predictors). One can observe and see that this  
 941 randomized predictor only uses SOA-type function: namely, the algorithm holds, at each iteration, a  
 942 distribution  $q_t$  over a finite set of SOA type functions  $\{s_k\}$ , and at each iteration picks the prediction  
 943 made by  $s_k$  with probability  $q_t(s_k)$ .

944 The extension in Corollary 4 of this predictor to the domain  $\Delta(\mathcal{D})$  is done by choosing:

$$f_t(d) = \mathbb{E}_{\bar{d}_{1:T}} \left[ \mathbb{E}_{s \sim L_0} [s(d)|d_1, \dots, d_{t-1}] \right] = \mathbb{E}_{\bar{d}_{1:T}} \left[ \sum q_t(s_k) s_k(d) | d_1, \dots, d_{t-1} \right]$$

945 Namely, the choice of  $f_t$  is the expectation over the algorithm's prediction, taking expectation  
 946 both over the choice of the algorithm and over the sequence of observations.  $d_1, \dots, d_{t-1}$ , drawn  
 947 according to  $\bar{d}_1, \dots, \bar{d}_{t-1}$ . Now because  $\bar{d}_1, \dots, \bar{d}_{t-1}$  all have finite support we can summarize these  
 948 expectations and write:

$$f_t = \sum \lambda_k s_k,$$

949 for some choice of SOA-type functions and weights  $\lambda_k \geq 0$ .

950 Since the sum of u.s.c functions is u.s.c and since the multiplication of a u.s.c function with positive  
 951 scalar is u.s.c, it is enough to prove that every SOA-type function  $s$  induces an u.s.c function over  
 952  $\Delta(\mathcal{D})$  via the identification  $\mu \mapsto \mu(\{d : s(d) = 1\})$ . By Claim 3 it is enough to show that the set

953  $s^{-1}(0)$  is open. To this end we show that for every  $d \in s^{-1}(0)$  there is an open neighborhood of  $d$   
954 which is contained in  $s^{-1}(0)$ . Indeed, if  $d \in s^{-1}(0)$ , then there exist  $x_1, \dots, x_{2^\ell}$  that  $d(x_i) = 0$  for  
955 all  $i$ , and they shatter a tree. Consider the open neighborhood of  $d$  defined by  $U = \cap_i \{d : d(x_i) = 0\}$ .  
956  $U \subseteq s^{-1}(0)$  since if there were  $d' \in U$  such that  $s(d') = 1$  then  $\text{Ldim}(\mathcal{H}|_{(d',0)}) < \text{Ldim}(\mathcal{H}) = \ell$ .  
957 However, since  $d' \in U$  then  $x_1, \dots, x_{2^\ell} \in \mathcal{H}|_{(d',0)}$  and they shatter a tree of depth  $\ell$  which is a  
958 contradiction.
